# Supplementary material for: Base-mediated synthesis of highly functionalized 2-aminonicotinonitriles from α-keto vinyl azides and α,α-dicyanoalkenes
Source: Royal Society of Chemistry journal article supplement (doi:10.1039/c6ra04669j), 2016-01-01
Supplement: c6ra04669j1.pdf [file c6ra04669j1.pdf]

**Base-Mediated Synthesis of Highly Functionalized 2-Aminonicotinitriles from  
 $\alpha$ -Keto Vinyl Azides and  $\alpha,\alpha$ -Dicyanoalkenes**

Ke Shu, Jiaan Shao, Hong Li, Binhui Chen, Pai Tang, Xingyu Liu, Wenteng Chen\*  
and Yongping Yu\*

Zhejiang Province Key Laboratory of Anti-Cancer Drug Research, College of  
Pharmaceutical Science, Zhejiang University, Hangzhou 310058, P. R. China

\* Corresponding authors, for W. Chen, E-mail: [wentengchen@zju.edu.cn](mailto:wentengchen@zju.edu.cn), Tel:  
+86-571-88208450; for Y. Yu, E-mail: [yyu@zju.edu.cn](mailto:yyu@zju.edu.cn), Tel: +86-571-88208452.

**Supporting Information**

**List of contents**

|                                                                       |         |
|-----------------------------------------------------------------------|---------|
| General Information.....                                              | S2      |
| General Procedure for the Synthesis of <b>3</b> .....                 | S3      |
| Characterization Data of compound <b>3</b> .....                      | S3-S12  |
| X-ray Crystallography Data of <b>3a</b> .....                         | S13-S14 |
| <sup>1</sup> H and <sup>13</sup> C NMR Spectra of Final Products..... | S14-S37 |
| <sup>13</sup> C- <sup>1</sup> H HMBC Spectra of <b>3v</b> .....       | S38     |

## General Information:

All solvents were purified according to standard methods prior to use. Purifications of reaction products were carried out by chromatography using silica gel (200-300 mesh). Melting points were recorded on a BÜCHI B-540 melting point apparatus. NMR spectra were recorded for  $^1\text{H}$  NMR at 500 MHz and for  $^{13}\text{C}$  NMR at 125 MHz. For  $^1\text{H}$  NMR, tetramethylsilane (TMS) served as internal standard ( $\delta=0$ ) and data are reported as follows: chemical shift, integration, multiplicity (s = singlet, d = doublet, t = triplet, q = quartet, m = multiplet), and coupling constant(s) in Hz. For  $^{13}\text{C}$  NMR, TMS ( $\delta=0$ ) or  $\text{CDCl}_3$  ( $\delta=77.16$ ) was used as internal standard and spectra were obtained with complete proton decoupling. HPLC analysis and the HRMS of all final products were confirmed on an Agilent 1290 HPLC-6224 Time of Flight Mass Spectrometer using Phenomenex Luna  $5\mu$  C18, 100 Å, 150 X 4.60 mm 5 micron column at a flow rate of 0.5 mL/min using linear gradients buffer B in A (B:  $\text{CH}_3\text{OH}$  containing 0.1 % formic acid, A:  $\text{H}_2\text{O}$  containing 0.1% formic acid). Mobile phase B was increased linearly from 5% to 95% over 7 min and 95% over the next 2 min, after which the column was equilibrated to 5% for 1 min. The starting materials  $\alpha$ -keto vinyl azides **1** were prepared according to the literature methods<sup>1</sup> and  $\alpha,\alpha$ -dicyanoalkenes **2** were readily prepared from the corresponding ketones with malononitrile *via* Knoevenagel condensation.<sup>2</sup>

## Reference:

- 1 (a) G. Zhang, H. Ni, W. Chen, J. Shao, H. Liu, B. Chen, Y. Yu, *Org. Lett.*, 2013, **15**, 5967; (b) R. Suresh, S. Muthusubramanian, M. Nagaraj, G. Manickam, *Tetrahedron Lett.*, 2013, **54**, 1779.
- 2 (a) D. T. Mowry, *J. Am. Chem. Soc.*, 1945, **67**, 1050; (b) A. R. Longstreet, B. S. Campbell, B. F. Gupton, D. T. McQuade, *Org. Lett.*, 2013, **15**, 5298; (c) S. Rout, S. K. Ray, R. A. Unhale, V. K. Singh, *Org. Lett.*, 2014, **16**, 5568; (d) S. L. Broman, A. U. Petersen, C. G. Tortzen, J. Vibenholt, A. D. Bond, M. B. Nielsen, *Org. Lett.*, 2012, **14**, 318.

## General Procedure for the Synthesis of 3:

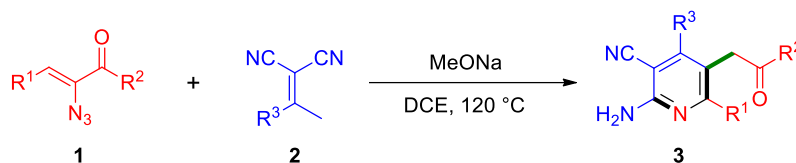

A mixture of vinyl azide **1** (1.0 mmol),  $\alpha,\alpha$ -dicyanoalkenes **2** (1.0 mmol, 1.0 equiv.) and MeONa (0.5 mmol, 0.5 equiv. when R<sup>3</sup> were aromatic groups, or 1.5 mmol, 1.5 equiv. when R<sup>3</sup> were alkyl groups) was stirred in DCE with a well-sealed tube at 120 °C (the temperature of oil bath) for several hours. After the completeness of the reaction, the reaction mixture was quenched with water (10 mL), and then extracted three times with DCM. The combined organic extracts were washed with brine, dried over anhydrous MgSO<sub>4</sub> and concentrated. Purification of the crude product was carried out by chromatography (silica gel, petroleum ether: ethyl acetate=9:1 to 3:1) to afford **3a-3y**.

## Characterization Data of compound 3

### 2-amino-5-(2-(4-chlorophenyl)-2-oxoethyl)-4,6-diphenylnicotinonitrile (**3a**)

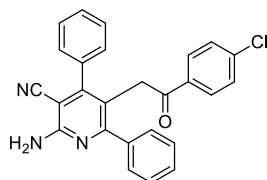

Brown-yellow solid, yield 80%, m.p. 194.3-195.8 °C, <sup>1</sup>H NMR (500 MHz, [D<sub>6</sub>]DMSO)  $\delta$  7.65 – 7.62 (m, 2H), 7.44 – 7.41 (m, 2H), 7.38 (dd,  $J$  = 11.4, 4.5 Hz, 2H), 7.35 – 7.29 (m, 6H), 7.25 – 7.21 (m, 2H), 7.00 (s, 2H), 3.96 (s, 2H); <sup>13</sup>C NMR (125 MHz, CDCl<sub>3</sub>)  $\delta$  197.20, 163.28, 158.03, 156.77, 139.69, 139.62, 136.36, 134.80, 129.28, 129.20, 128.98, 128.91, 128.86, 128.60, 128.08, 128.06, 117.66, 116.25, 91.92, 40.10. HRMS (ESI):  $m/z$  calcd for C<sub>26</sub>H<sub>19</sub>ClN<sub>3</sub>O [M+H]<sup>+</sup>: 424.1211, found: 424.1219.

### 2-amino-4,6-bis(4-bromophenyl)-5-(2-oxo-2-phenylethyl)nicotinonitrile (**3b**)

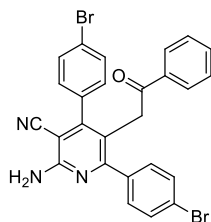

Pale yellow solid, yield 74%, m.p. 168.3-170.1 °C, <sup>1</sup>H NMR (500 MHz, [D<sub>6</sub>]DMSO) δ 7.66 – 7.63 (m, 2H), 7.60 – 7.54 (m, 5H), 7.39 (t, *J* = 7.8 Hz, 2H), 7.32 – 7.28 (m, 2H), 7.20 (d, *J* = 8.4 Hz, 2H), 7.08 (s, 2H), 3.99 (s, 2H); <sup>13</sup>C NMR (125 MHz, CDCl<sub>3</sub>) δ 198.21, 162.25, 157.94, 155.75, 138.37, 136.11, 135.06, 133.67, 132.23, 131.78, 129.87, 129.77, 128.78, 127.86, 123.91, 123.52, 117.74, 115.99, 91.95, 40.11. HRMS (ESI): *m/z* calcd for C<sub>26</sub>H<sub>18</sub>Br<sub>2</sub>N<sub>3</sub>O [M+H]<sup>+</sup>: 547.9791, found: 547.9796.

**2-amino-6-(3-bromophenyl)-5-(2-oxo-2-phenylethyl)-4-phenylnicotinonitrile (3c)**

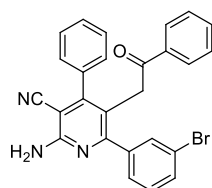

Yellow solid, yield 82%, m.p. 154.5-156.7 °C, <sup>1</sup>H NMR (500 MHz, [D<sub>6</sub>]DMSO) δ 7.63 (d, *J* = 7.5 Hz, 2H), 7.56 – 7.51 (m, 3H), 7.41 – 7.34 (m, 6H), 7.30 (t, *J* = 7.7 Hz, 1H), 7.24 (d, *J* = 6.9 Hz, 2H), 7.04 (s, 2H), 3.98 (s, 2H); <sup>13</sup>C NMR (125 MHz, CDCl<sub>3</sub>) δ 198.33, 161.59, 157.91, 157.04, 141.67, 136.48, 136.21, 133.34, 131.97, 131.38, 130.07, 129.34, 128.94, 128.61, 128.05, 127.82, 126.73, 122.72, 118.08, 116.13, 92.37, 40.10. HRMS (ESI): *m/z* calcd for C<sub>26</sub>H<sub>19</sub>BrN<sub>3</sub>O [M+H]<sup>+</sup>: 468.0706, found: 468.0710.

**2-amino-6-(2-bromophenyl)-5-(2-oxo-2-phenylethyl)-4-phenylnicotinonitrile (3d)**

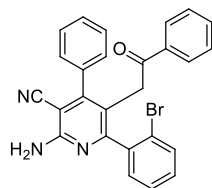

Yellow solid, yield 78%, m.p. 203.7-204.8 °C, <sup>1</sup>H NMR (500 MHz, [D<sub>6</sub>]DMSO) δ 7.63 (d, *J* = 7.9 Hz, 1H), 7.55 (d, *J* = 7.6 Hz, 2H), 7.49 (dd, *J* = 14.2, 7.2 Hz, 2H), 7.38 (d, *J* = 7.9 Hz, 2H), 7.36 – 7.26 (m, 4H), 7.22 (dd, *J* = 7.7, 1.2 Hz, 1H), 7.19 – 7.13 (m, 2H), 7.08 (s, 2H), 3.86 (d, *J* = 18.3 Hz, 1H), 3.70 (d, *J* = 18.3 Hz, 1H); <sup>13</sup>C NMR (125 MHz, CDCl<sub>3</sub>) δ 197.59, 162.18, 158.13, 156.59, 140.07, 136.53, 136.10, 133.18, 132.73, 130.60, 130.24, 129.37, 128.98, 128.87, 128.50, 128.29, 128.14, 127.72, 121.29, 118.85, 116.24, 92.34, 39.33. HRMS (ESI): *m/z* calcd for C<sub>26</sub>H<sub>19</sub>BrN<sub>3</sub>O [M+H]<sup>+</sup>: 468.0706, found: 468.0714.

### 2-amino-6-(2-chlorophenyl)-5-(2-oxo-2-phenylethyl)-4-phenylnicotinonitrile (3e)

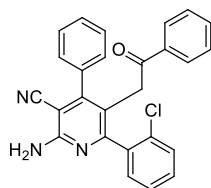

Yellow solid, yield 79%, m.p. 213.9-215.8 °C, <sup>1</sup>H NMR (500 MHz, [D<sub>6</sub>]DMSO) δ 7.55 (d, *J* = 7.4 Hz, 2H), 7.52 – 7.45 (m, 3H), 7.37 (dd, *J* = 14.6, 7.6 Hz, 3H), 7.34 – 7.26 (m, 4H), 7.22 – 7.15 (m, 2H), 7.05 (s, 2H), 3.89 (d, *J* = 18.4 Hz, 1H), 3.71 (d, *J* = 18.4 Hz, 1H); <sup>13</sup>C NMR (125 MHz, CDCl<sub>3</sub>) δ 197.57, 161.01, 158.17, 156.50, 138.16, 136.51, 136.09, 133.17, 131.63, 130.61, 130.11, 129.62, 129.36, 128.96, 128.87, 128.49, 128.28, 128.16, 127.70, 127.17, 119.06, 116.24, 92.32, 39.23. HRMS (ESI): *m/z* calcd for C<sub>26</sub>H<sub>19</sub>ClN<sub>3</sub>O [M+H]<sup>+</sup>: 424.1211, found: 424.1212.

### 2-amino-6-(naphthalen-1-yl)-5-(2-oxo-2-phenylethyl)-4-phenylnicotinonitrile (3f)

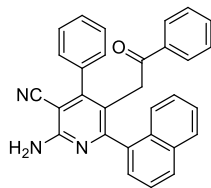

Yellow solid, yield 75%, m.p. 207.3-210.1 °C, <sup>1</sup>H NMR (500 MHz, [D<sub>6</sub>]DMSO) δ 7.92 – 7.89 (m, 1H), 7.85 (d, *J* = 8.2 Hz, 1H), 7.56 – 7.55 (m, 1H), 7.54 – 7.49 (m, 2H), 7.46 – 7.39 (m, 4H), 7.37 (d, *J* = 7.2 Hz, 4H), 7.30 (d, *J* = 6.9 Hz, 1H), 7.24 (dd, *J* = 15.6, 8.0 Hz, 3H), 7.01 (s, 2H), 3.87 (d, *J* = 18.3 Hz, 1H), 3.62 (d, *J* = 18.3 Hz, 1H); <sup>13</sup>C NMR (125 MHz, CDCl<sub>3</sub>) δ 197.94, 162.68, 158.10, 156.71, 136.61, 136.52, 136.27, 133.72, 132.95, 130.71, 129.29, 129.07, 128.92, 128.83, 128.51, 128.31, 127.55, 126.87, 126.39, 126.30, 125.30, 125.26, 119.77, 116.33, 92.07, 39.56. HRMS (ESI): *m/z* calcd for C<sub>30</sub>H<sub>22</sub>N<sub>3</sub>O [M+H]<sup>+</sup>: 440.1757, found: 440.1752.

### 2-amino-6-(4-methoxyphenyl)-5-(2-oxo-2-phenylethyl)-4-phenylnicotinonitrile (3g)

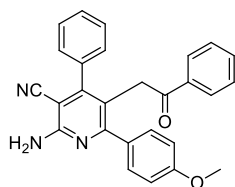

Pale yellow solid, yield 81%, m.p. 179.3-181.7 °C, <sup>1</sup>H NMR (500 MHz, [D<sub>6</sub>]DMSO) δ 7.64 (d, *J* = 7.6 Hz, 2H), 7.53 (t, *J* = 7.4 Hz, 1H), 7.37 (t, *J* = 8.4 Hz, 4H), 7.32 (d, *J*

= 8.5 Hz, 3H), 7.22 (d,  $J = 7.1$  Hz, 2H), 6.92 (s, 2H), 6.90 (d,  $J = 8.7$  Hz, 2H), 4.01 (s, 2H), 3.71 (s, 3H);  $^{13}\text{C}$  NMR (125 MHz,  $\text{CDCl}_3$ )  $\delta$  198.64, 163.06, 160.16, 157.94, 156.75, 136.63, 136.58, 133.19, 132.19, 129.70, 129.15, 128.85, 128.55, 128.09, 127.83, 117.97, 116.46, 113.98, 91.55, 55.44, 40.49. HRMS (ESI):  $m/z$  calcd for  $\text{C}_{27}\text{H}_{22}\text{N}_3\text{O}_2$   $[\text{M}+\text{H}]^+$ : 420.1707, found: 420.1716.

### 2-amino-6-(4-chlorophenyl)-5-(2-oxo-2-(p-tolyl)ethyl)-4-phenylnicotinonitrile

(3h)

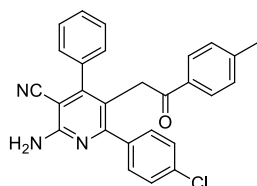

Pale yellow solid, yield 80%, m.p. 204.7-205.4 °C,  $^1\text{H}$  NMR (500 MHz,  $[\text{D}_6]\text{DMSO}$ )  $\delta$  7.53 (d,  $J = 8.2$  Hz, 2H), 7.42 – 7.40 (m, 2H), 7.39 – 7.35 (m, 4H), 7.34 (d,  $J = 7.1$  Hz, 1H), 7.23 – 7.21 (m, 2H), 7.16 (d,  $J = 8.1$  Hz, 2H), 7.00 (s, 2H), 3.94 (s, 2H), 2.29 (s, 3H);  $^{13}\text{C}$  NMR (125 MHz,  $\text{CDCl}_3$ )  $\delta$  197.86, 162.06, 157.86, 156.98, 144.31, 138.24, 136.30, 135.08, 133.89, 129.69, 129.32, 129.29, 128.90, 128.77, 128.05, 127.97, 118.17, 116.21, 92.25, 40.10, 21.73. HRMS (ESI):  $m/z$  calcd for  $\text{C}_{27}\text{H}_{21}\text{ClN}_3\text{O}$   $[\text{M}+\text{H}]^+$ : 438.1368, found: 438.1368.

### 2-amino-5-(2-oxo-2-phenylethyl)-4-phenyl-6-propylnicotinonitrile (3i)

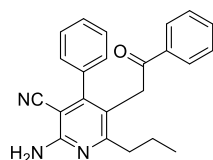

White solid, yield 80%, m.p. 157.1-158.2 °C,  $^1\text{H}$  NMR (500 MHz,  $[\text{D}_6]\text{DMSO}$ )  $\delta$  7.85 (d,  $J = 7.7$  Hz, 2H), 7.61 (t,  $J = 7.4$  Hz, 1H), 7.47 (t,  $J = 7.7$  Hz, 2H), 7.40-7.34 (m, 3H), 7.15 (d,  $J = 7.6$  Hz, 2H), 6.76 (s, 2H), 4.09 (s, 2H), 2.46 (t,  $J = 7.75$  Hz, 2H), 1.65-1.57 (m, 2H), 0.86 (t,  $J = 7.3$  Hz, 3H);  $^{13}\text{C}$  NMR (125 MHz,  $\text{CDCl}_3$ )  $\delta$  197.38, 165.67, 158.15, 155.51, 136.70, 136.56, 133.52, 129.13, 128.88, 128.82, 128.09, 128.05, 117.60, 116.73, 90.08, 38.97, 38.13, 22.03, 14.31. HRMS (ESI):  $m/z$  calcd for  $\text{C}_{23}\text{H}_{22}\text{N}_3\text{O}$   $[\text{M}+\text{H}]^+$ : 356.1757, found: 356.1758.

**2-amino-4-(4-bromophenyl)-5-(2-(4-nitrophenyl)-2-oxoethyl)-6-phenylnicotinonitrile (3j)**

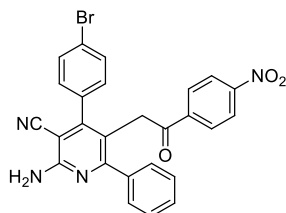

Brown-yellow solid, yield 82%, m.p. 214.7-216.3 °C, <sup>1</sup>H NMR (500 MHz, [D<sub>6</sub>]DMSO) δ 8.18 (d, *J* = 8.8 Hz, 2H), 7.83 (d, *J* = 8.8 Hz, 2H), 7.57 (d, *J* = 8.4 Hz, 2H), 7.36 – 7.32 (m, 5H), 7.22 (d, *J* = 8.4 Hz, 2H), 7.06 (s, 2H), 4.08 (s, 2H); <sup>13</sup>C NMR (125 MHz, CDCl<sub>3</sub>) δ 196.95, 163.54, 158.09, 155.50, 150.50, 140.73, 139.42, 135.08, 132.35, 129.80, 129.21, 128.83, 128.78, 127.96, 124.03, 123.91, 116.99, 115.97, 91.64, 40.57. HRMS (ESI): *m/z* calcd for C<sub>26</sub>H<sub>18</sub>BrN<sub>4</sub>O<sub>3</sub> [M+H]<sup>+</sup>: 513.0557, found: 513.0563.

**2-amino-4-(4-bromophenyl)-5-(2-(4-chlorophenyl)-2-oxoethyl)-6-phenylnicotinonitrile (3k)**

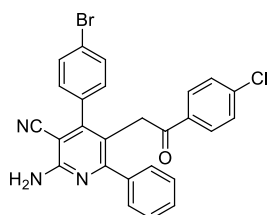

Pale yellow solid, yield 81%, m.p. 196.0-197.2 °C, <sup>1</sup>H NMR (500 MHz, [D<sub>6</sub>]DMSO) δ 7.65 (d, *J* = 8.2 Hz, 2H), 7.58 (d, *J* = 7.9 Hz, 2H), 7.44 (d, *J* = 8.1 Hz, 2H), 7.33 (s, 5H), 7.21 (d, *J* = 8.0 Hz, 2H), 7.08 (s, 2H), 3.98 (s, 2H); <sup>13</sup>C NMR (125 MHz, CDCl<sub>3</sub>) δ 197.07, 163.49, 157.99, 155.50, 140.00, 139.43, 135.16, 134.51, 132.21, 129.80, 129.26, 129.09, 129.00, 128.66, 127.97, 123.88, 117.47, 116.12, 91.56, 40.05. HRMS (ESI): *m/z* calcd for C<sub>26</sub>H<sub>18</sub>BrClN<sub>3</sub>O [M+H]<sup>+</sup>: 502.0316, found: 502.0313.

**2-amino-5-(2-oxo-2-phenylethyl)-4,6-diphenylnicotinonitrile (3l)**

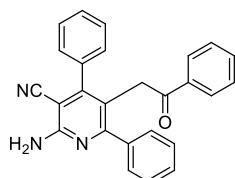

Brown-yellow solid, yield 81%, m.p. 196.7-198.4 °C, <sup>1</sup>H NMR (500 MHz, [D<sub>6</sub>]DMSO) δ 7.61 (d, *J* = 7.3 Hz, 2H), 7.52 (t, *J* = 7.4 Hz, 1H), 7.37 (dd, *J* = 7.6, 5.3

Hz, 4H), 7.35 – 7.31 (m, 6H), 7.24 (d,  $J = 6.9$  Hz, 2H), 6.97 (s, 2H), 3.97 (s, 2H);  $^{13}\text{C}$  NMR (125 MHz,  $\text{CDCl}_3$ )  $\delta$  198.44, 163.33, 157.97, 156.82, 139.74, 136.61, 136.44, 133.19, 129.22, 128.91, 128.88, 128.58, 128.54, 128.12, 128.09, 127.79, 118.00, 116.34, 91.94, 40.25. HRMS (ESI):  $m/z$  calcd for  $\text{C}_{26}\text{H}_{20}\text{N}_3\text{O}$   $[\text{M}+\text{H}]^+$ : 390.1601, found: 390.1603.

### 2-amino-5-(2-oxo-2-(p-tolyl)ethyl)-4,6-diphenylnicotinonitrile (3m)

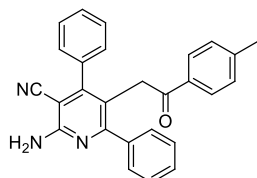

Brown solid, yield 81%, m.p. 183.1-184.9 °C,  $^1\text{H}$  NMR (500 MHz,  $[\text{D}_6]\text{DMSO}$ )  $\delta$  7.53 (d,  $J = 8.2$  Hz, 2H), 7.37 (d,  $J = 7.4$  Hz, 2H), 7.35 – 7.32 (m, 6H), 7.25 – 7.22 (m, 2H), 7.15 (d,  $J = 8.0$  Hz, 2H), 6.96 (s, 2H), 3.93 (s, 2H), 2.28 (s, 3H);  $^{13}\text{C}$  NMR (125 MHz,  $\text{CDCl}_3$ )  $\delta$  197.93, 163.30, 157.94, 156.80, 144.02, 139.78, 136.47, 134.07, 129.21, 129.17, 128.86, 128.83, 128.54, 128.13, 128.10, 127.94, 118.10, 116.37, 91.90, 40.13, 21.69. HRMS (ESI):  $m/z$  calcd for  $\text{C}_{27}\text{H}_{22}\text{N}_3\text{O}$   $[\text{M}+\text{H}]^+$ : 404.1757, found: 404.1763.

### 2-amino-5-(2-(4-methoxyphenyl)-2-oxoethyl)-4,6-diphenylnicotinonitrile (3n)

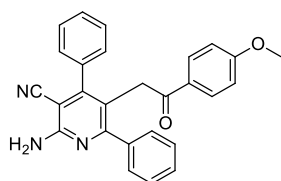

Orange solid, yield 80%, m.p. 188.8-189.5 °C,  $^1\text{H}$  NMR (500 MHz,  $[\text{D}_6]\text{DMSO}$ )  $\delta$  7.63 (d,  $J = 8.8$  Hz, 2H), 7.40 – 7.34 (m, 3H), 7.33 (s, 5H), 7.23 (d,  $J = 6.8$  Hz, 2H), 6.95 (s, 2H), 6.86 (d,  $J = 8.8$  Hz, 2H), 3.90 (s, 2H), 3.76 (s, 3H);  $^{13}\text{C}$  NMR (125 MHz,  $\text{CDCl}_3$ )  $\delta$  196.74, 163.58, 163.28, 157.90, 156.78, 139.78, 136.48, 130.13, 129.54, 129.16, 128.85, 128.81, 128.52, 128.16, 128.13, 118.27, 116.39, 113.67, 91.90, 55.54, 39.80. HRMS (ESI):  $m/z$  calcd for  $\text{C}_{27}\text{H}_{22}\text{N}_3\text{O}_2$   $[\text{M}+\text{H}]^+$ : 420.1707, found: 420.1705.

### 2-amino-4-(4-bromophenyl)-5-(2-oxo-2-(thiophen-2-yl)ethyl)-6-phenylnicotinonitrile (3o)

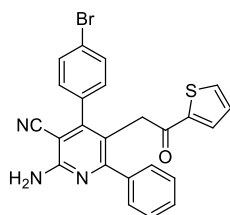



Brown solid, yield 85%, m.p. 215.4-216.2 °C, <sup>1</sup>H NMR (500 MHz, [D<sub>6</sub>]DMSO) δ 7.90 (d, *J* = 4.4 Hz, 1H), 7.59 (d, *J* = 8.1 Hz, 2H), 7.54 (d, *J* = 2.9 Hz, 1H), 7.36 (s, 5H), 7.23 (d, *J* = 8.0 Hz, 2H), 7.04 (m, 3H), 3.93 (s, 2H); <sup>13</sup>C NMR (125 MHz, CDCl<sub>3</sub>) δ 190.69, 163.64, 157.95, 155.60, 143.01, 139.46, 135.19, 134.09, 132.18, 131.95, 129.96, 129.05, 128.63, 128.18, 128.12, 123.83, 117.54, 116.11, 91.57, 40.54. HRMS (ESI): *m/z* calcd for C<sub>24</sub>H<sub>17</sub>BrN<sub>3</sub>OS [M+H]<sup>+</sup>: 474.0270, found: 474.0276.

**2-amino-5-(2-(4-chlorophenyl)-2-oxoethyl)-6-phenyl-4-(p-tolyl)nicotinonitrile (3q)**

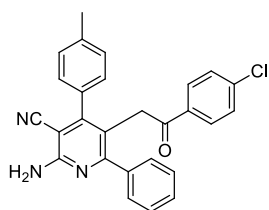

Pale yellow solid, yield 80%, m.p. 201.2-203.5 °C, <sup>1</sup>H NMR (500 MHz, [D<sub>6</sub>]DMSO) δ 7.63 (d, *J* = 8.7 Hz, 2H), 7.43 (d, *J* = 8.7 Hz, 2H), 7.35 – 7.31 (m, 5H), 7.17 (d, *J* = 7.8 Hz, 2H), 7.11 (d, *J* = 8.1 Hz, 2H), 6.94 (s, 2H), 3.96 (s, 2H), 2.24 (s, 3H); <sup>13</sup>C NMR (125 MHz, CDCl<sub>3</sub>) δ 197.30, 163.23, 158.00, 156.93, 139.77, 139.64, 139.24, 134.87, 133.40, 129.60, 129.27, 128.92, 128.82, 128.60, 128.07, 127.98, 117.87, 116.44, 92.04, 40.12, 21.39. HRMS (ESI): *m/z* calcd for C<sub>27</sub>H<sub>21</sub>ClN<sub>3</sub>O [M+H]<sup>+</sup>: 438.1368, found: 438.1369.

**2-amino-5-(2-(4-chlorophenyl)-2-oxoethyl)-6-phenyl-4-(thiophen-2-yl)nicotinonitrile (3r)**

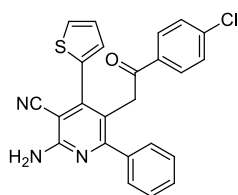

Brown solid, yield 82%, m.p. 202.7-204.1 °C, <sup>1</sup>H NMR (500 MHz, [D<sub>6</sub>]DMSO) δ 7.75 (d, *J* = 8.6 Hz, 2H), 7.66 (dd, *J* = 5.0, 1.1 Hz, 1H), 7.48 (d, *J* = 8.6 Hz, 2H), 7.35 – 7.32 (m, 5H), 7.11 (dd, *J* = 3.5, 1.1 Hz, 1H), 7.08 – 7.04 (m, 3H), 4.06 (s, 2H); <sup>13</sup>C NMR (125 MHz, CDCl<sub>3</sub>) δ 197.12, 163.42, 158.12, 149.61, 139.87, 139.54, 135.39, 134.72, 129.46, 129.40, 129.10, 128.99, 128.65, 128.16, 128.04, 127.65, 118.92, 116.18, 92.81, 40.59. HRMS (ESI): *m/z* calcd for C<sub>24</sub>H<sub>17</sub>ClN<sub>3</sub>OS [M+H]<sup>+</sup>: 430.0775, found: 430.0779.

### 2-amino-4-(naphthalen-2-yl)-5-(2-oxo-2-phenylethyl)-6-phenylnicotinonitrile (3s)

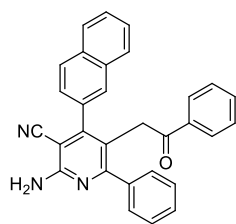

Brown-yellow solid, yield 79%, m.p. 200.1-202.2 °C, <sup>1</sup>H NMR (500 MHz, [D<sub>6</sub>]DMSO) δ 7.92 (d, *J* = 8.5 Hz, 1H), 7.90 – 7.87 (m, 2H), 7.83 (s, 1H), 7.58 – 7.55 (m, 2H), 7.54 – 7.50 (m, 2H), 7.43 (t, *J* = 7.4 Hz, 1H), 7.39 – 7.36 (m, 3H), 7.34 (dd, *J* = 7.5, 5.0 Hz, 3H), 7.25 (t, *J* = 7.8 Hz, 2H), 7.01 (s, 2H), 4.02 (s, 2H); <sup>13</sup>C NMR (125 MHz, CDCl<sub>3</sub>) δ 198.50, 163.39, 158.02, 156.71, 139.77, 136.51, 133.85, 133.30, 133.11, 133.02, 128.92, 128.84, 128.59, 128.44, 128.14, 127.89, 127.87, 127.72, 127.01, 126.79, 125.44, 118.27, 116.40, 92.06, 40.28. HRMS (ESI): *m/z* calcd for C<sub>30</sub>H<sub>22</sub>N<sub>3</sub>O [M+H]<sup>+</sup>: 440.1757, found: 440.1764.

### 2-amino-4-(naphthalen-1-yl)-5-(2-oxo-2-phenylethyl)-6-phenylnicotinonitrile (3t)

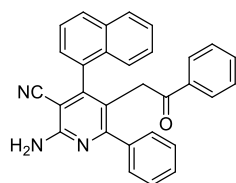

Yellow solid, yield 78%, m.p. 210.1-212.0 °C, <sup>1</sup>H NMR (500 MHz, [D<sub>6</sub>]DMSO) δ 7.94 (dd, *J* = 5.5, 3.9 Hz, 1H), 7.88 (d, *J* = 8.3 Hz, 1H), 7.54 (dt, *J* = 6.3, 2.8 Hz, 2H), 7.48 – 7.41 (m, 5H), 7.38 – 7.33 (m, 5H), 7.31 (dd, *J* = 7.1, 0.9 Hz, 1H), 7.22 (t, *J* = 7.8 Hz, 2H), 7.03 (s, 2H), 3.97 (d, *J* = 18.3 Hz, 1H), 3.64 (d, *J* = 18.3 Hz, 1H); <sup>13</sup>C NMR (125 MHz, CDCl<sub>3</sub>) δ 198.07, 163.44, 158.05, 155.42, 139.67, 136.50, 133.60, 133.42, 132.97, 130.27, 129.62, 128.98, 128.77, 128.59, 128.32, 127.56, 127.25, 127.23, 126.50, 125.42, 124.62, 119.45, 116.01, 92.85, 39.78. HRMS (ESI): *m/z* calcd for C<sub>30</sub>H<sub>22</sub>N<sub>3</sub>O [M+H]<sup>+</sup>: 440.1757, found: 440.1759.

### 2-amino-4-(tert-butyl)-5-(2-oxo-2-phenylethyl)-6-phenylnicotinonitrile (3u)

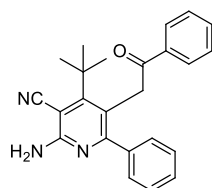

Pale yellow solid, yield 83%, m.p. 218.2-219.1 °C, <sup>1</sup>H NMR (500 MHz, [D<sub>6</sub>]DMSO) δ 7.83 – 7.80 (m, 2H), 7.61 – 7.57 (m, 1H), 7.45 (t, *J* = 7.8 Hz, 2H), 7.30 – 7.24 (m,

3H), 7.15 (dd,  $J = 7.8, 1.6$  Hz, 2H), 6.63 (s, 2H), 4.53 (s, 2H), 1.50 (s, 9H);  $^{13}\text{C}$  NMR (125 MHz,  $\text{CDCl}_3$ )  $\delta$  198.45, 165.46, 163.35, 159.83, 141.10, 136.57, 133.33, 128.74, 128.58, 128.41, 127.87, 127.71, 119.49, 117.21, 90.42, 42.32, 39.25, 32.33. HRMS (ESI):  $m/z$  calcd for  $\text{C}_{24}\text{H}_{24}\text{N}_3\text{O}$   $[\text{M}+\text{H}]^+$ : 370.1914, found: 370.1913.

### 2-amino-4-methyl-5-(2-oxo-2-phenylethyl)-6-phenylnicotinonitrile (3v)

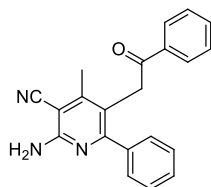

Pale yellow solid, yield 79%, m.p. 198.2-200.4 °C,  $^1\text{H}$  NMR (500 MHz,  $[\text{D}_6]\text{DMSO}$ )  $\delta$  7.94 (d,  $J = 7.2$  Hz, 2H), 7.65 (t,  $J = 7.4$  Hz, 1H), 7.51 (t,  $J = 7.8$  Hz, 2H), 7.36 – 7.31 (m, 3H), 7.26 – 7.21 (m, 2H), 6.78 (s, 2H), 4.28 (s, 2H), 2.24 (s, 3H);  $^{13}\text{C}$  NMR (125 MHz,  $\text{CDCl}_3$ )  $\delta$  197.14, 162.41, 157.93, 153.41, 139.81, 136.37, 133.73, 128.92, 128.90, 128.65, 128.23, 128.15, 118.15, 116.60, 92.49, 39.97, 29.85. HRMS (ESI):  $m/z$  calcd for  $\text{C}_{21}\text{H}_{18}\text{N}_3\text{O}$   $[\text{M}+\text{H}]^+$ : 328.1444, found: 328.1439.

### 2-amino-6-(4-bromophenyl)-5-(2-oxo-2-phenylethyl)-4-(4-(trifluoromethyl)phenyl)nicotinonitrile (3w)

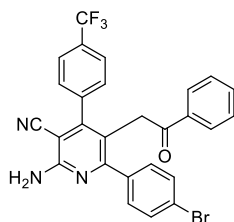

Yellow solid, yield 83%, m.p. 202.7-203.3 °C,  $^1\text{H}$  NMR (500 MHz,  $[\text{D}_6]\text{DMSO}$ )  $\delta$  7.75 (d,  $J = 8.2$  Hz, 2H), 7.59 (dd,  $J = 15.3, 7.9$  Hz, 4H), 7.54 (t,  $J = 7.4$  Hz, 1H), 7.50 (d,  $J = 8.1$  Hz, 2H), 7.36 (dd,  $J = 14.3, 8.1$  Hz, 4H), 7.16 (s, 2H), 4.00 (s, 2H);  $^{13}\text{C}$  NMR (125 MHz,  $\text{CDCl}_3$ )  $\delta$  198.17, 162.40, 157.89, 155.36, 139.82, 138.27, 136.06, 133.73, 131.83, 129.89, 128.76, 128.73, 127.80, 127.78, 126.02, 125.99, 125.96, 123.62, 115.80, 91.71, 39.94. HRMS (ESI):  $m/z$  calcd for  $\text{C}_{27}\text{H}_{18}\text{BrF}_3\text{N}_3\text{O}$   $[\text{M}+\text{H}]^+$ : 536.0580, found: 536.0585.

**2-amino-6-(4-bromophenyl)-4-(4-methoxyphenyl)-5-(2-oxo-2-phenylethyl)nicotinonitrile (3x)**

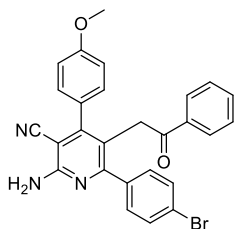

Brown solid, yield 80%, m.p. 85.2-86.7 °C, <sup>1</sup>H NMR (500 MHz, [D<sub>6</sub>]DMSO) δ 7.65 (d, *J* = 7.4 Hz, 2H), 7.55 (d, *J* = 8.3 Hz, 3H), 7.39 (t, *J* = 7.8 Hz, 2H), 7.31 (d, *J* = 8.4 Hz, 2H), 7.17 (d, *J* = 8.6 Hz, 2H), 6.98 (s, 2H), 6.92 (d, *J* = 8.7 Hz, 2H), 4.00 (s, 2H), 3.70 (s, 3H); <sup>13</sup>C NMR (125 MHz, CDCl<sub>3</sub>) δ 198.47, 161.98, 160.30, 157.98, 156.93, 138.78, 136.50, 133.38, 131.72, 129.96, 129.52, 128.65, 128.43, 127.87, 123.33, 118.35, 116.38, 114.41, 92.60, 55.35, 40.27. HRMS (ESI): *m/z* calcd for C<sub>27</sub>H<sub>21</sub>BrN<sub>3</sub>O<sub>2</sub> [M+H]<sup>+</sup>: 498.0812, found: 498.0839.

**2-amino-6-(4-bromophenyl)-5-(3,3-dimethyl-2-oxobutyl)-4-phenylnicotinonitrile (3y)**

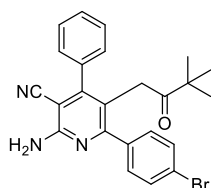

Light brown solid, yield 76%, m.p. 179.8-181.2 °C, <sup>1</sup>H NMR (500 MHz, [D<sub>6</sub>]DMSO) δ 7.64 (d, *J* = 8.5 Hz, 2H), 7.50 – 7.45 (m, 3H), 7.22 (d, *J* = 8.4 Hz, 2H), 7.16 (d, *J* = 6.3 Hz, 2H), 6.97 (s, 2H), 3.49 (s, 2H), 0.68 (s, 9H); <sup>13</sup>C NMR (125 MHz, CDCl<sub>3</sub>) δ 213.40, 161.93, 157.77, 156.81, 138.71, 136.33, 131.62, 129.90, 129.30, 128.88, 128.04, 123.34, 117.88, 116.11, 92.25, 44.10, 38.67, 26.51. HRMS (ESI): *m/z* calcd for C<sub>24</sub>H<sub>23</sub>BrN<sub>3</sub>O [M+H]<sup>+</sup>: 448.1019, found: 448.1034.

### X-ray Crystallography Data of 3a (CCDC No. 1431902)

Single crystals of compound **3a** were measured on a Rigaku RAXIS-RAPID single-crystal diffractometer.

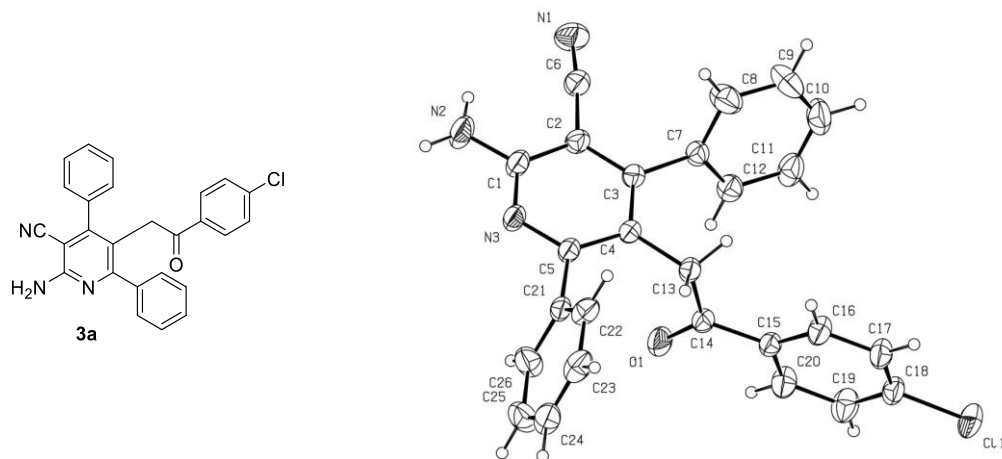

**Figure S1.** X-ray crystal structure of **3a**

**Table S1.** X-ray crystallography data of **3a**

|                                 |                                                                                                                           |
|---------------------------------|---------------------------------------------------------------------------------------------------------------------------|
| Formula moiety                  | C <sub>26</sub> H <sub>18</sub> ClN <sub>3</sub> O                                                                        |
| Formula sum                     | C <sub>26</sub> H <sub>18</sub> ClN <sub>3</sub> O                                                                        |
| Formula weight                  | 423.88                                                                                                                    |
| Temperature                     | 293(2) K                                                                                                                  |
| Crystal system                  | monoclinic                                                                                                                |
| Space group                     | P 1 21 /c 1                                                                                                               |
| Unit cell dimensions            | a= 12.1894(9) Å<br>b= 9.6526(7) Å<br>c= 20.0169(17) Å<br>alpha=90.00 deg.<br>beta = 109.306(6) deg.<br>gamma = 90.00 deg. |
| Volume                          | 2222.7 (3) Å <sup>3</sup>                                                                                                 |
| Z                               | 4                                                                                                                         |
| Calculated density              | 1.267 g/cm <sup>3</sup>                                                                                                   |
| Absorption coefficient          | 0.194 mm <sup>-1</sup>                                                                                                    |
| F(000)                          | 880.0                                                                                                                     |
| Crystal size                    | 0.45 x 0.28 x 0.2 mm                                                                                                      |
| Theta range for data collection | 3.0113 to 29.4476 deg                                                                                                     |
| Reflections collected / unique  | 9063 / 4066 [R(int) = 0.0356]                                                                                             |

|                                      |                           |
|--------------------------------------|---------------------------|
| Data / restraints / parameters       | 4066 / 1 / 285            |
| Goodness-of-fit on F2                | 1.023                     |
| Final R indices [ $I > 2\sigma(I)$ ] | R1 = 0.0512, wR2 = 0.1103 |
| R indices (all data)                 | R1 = 0.0906, wR2 = 0.1309 |

### $^1\text{H}$ NMR and $^{13}\text{C}$ NMR Spectra of Final Products

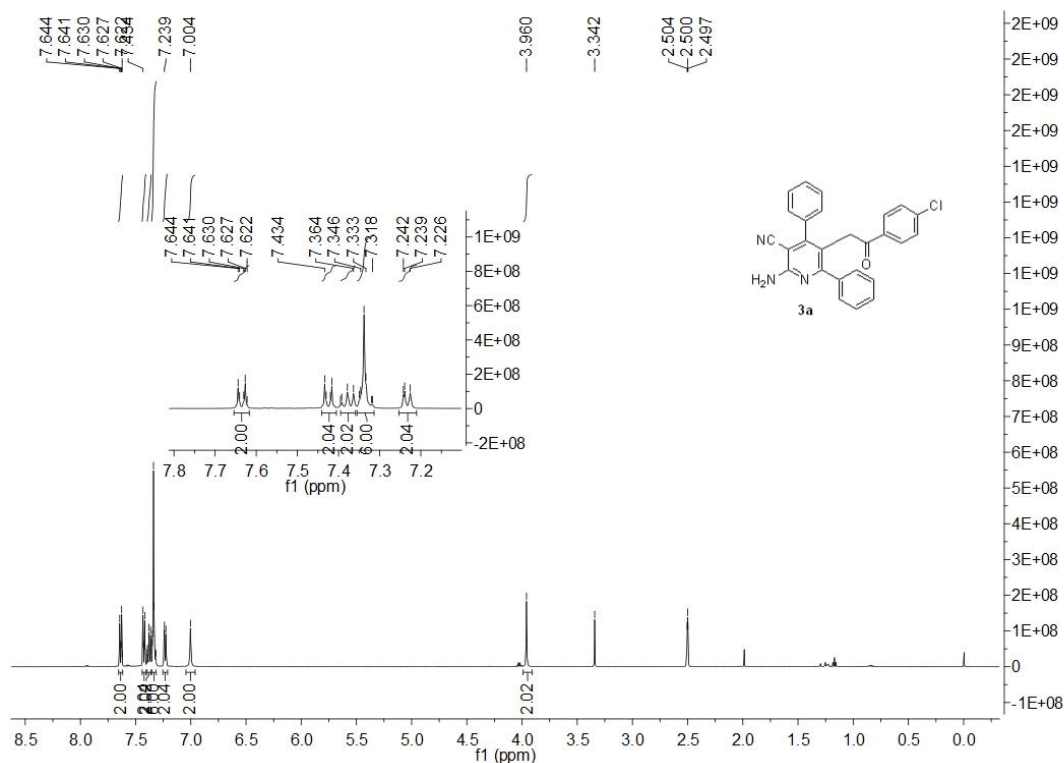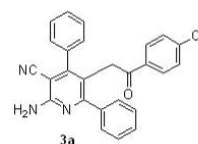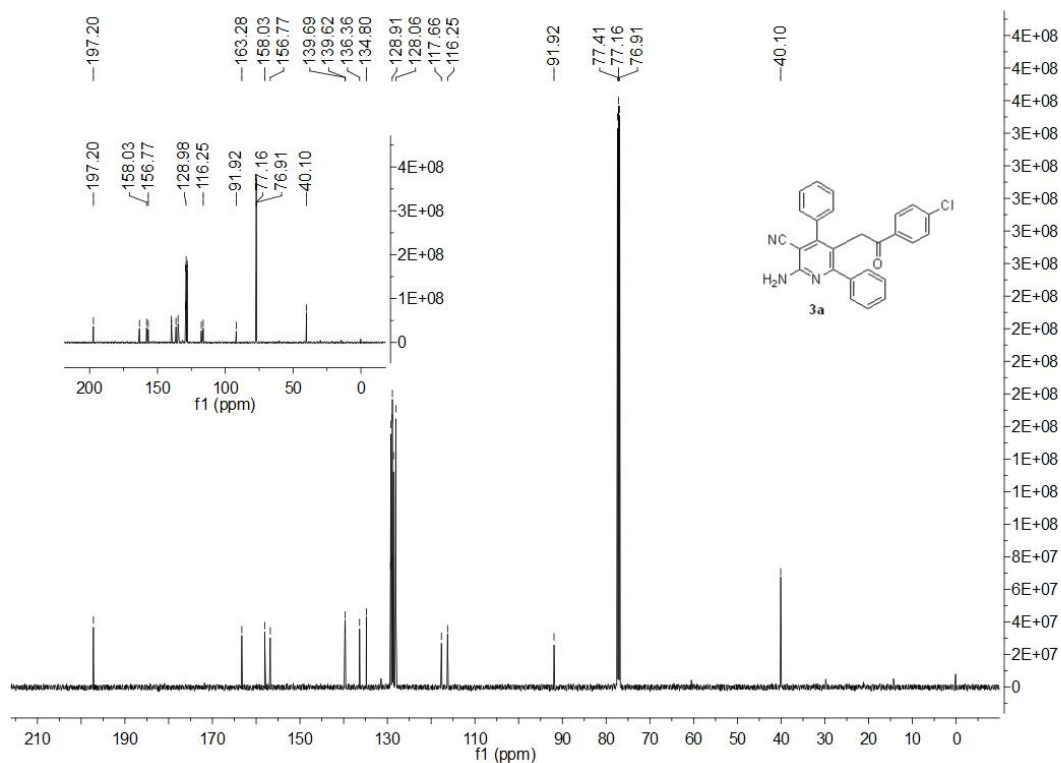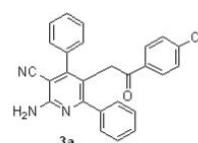

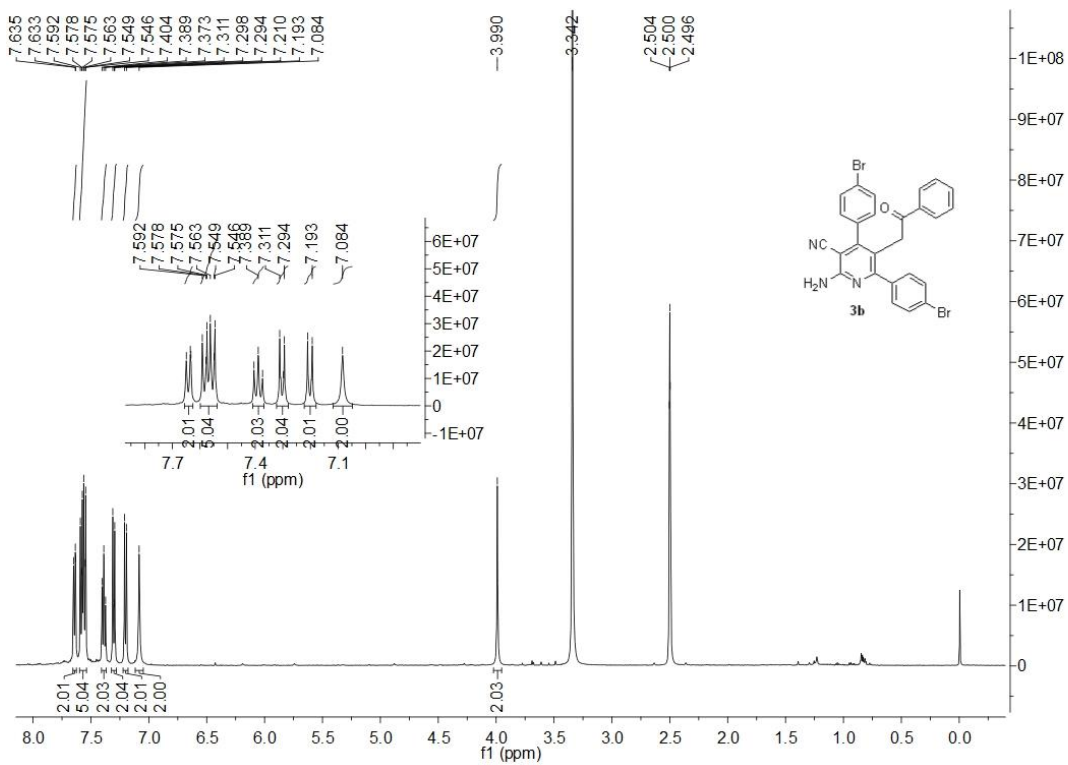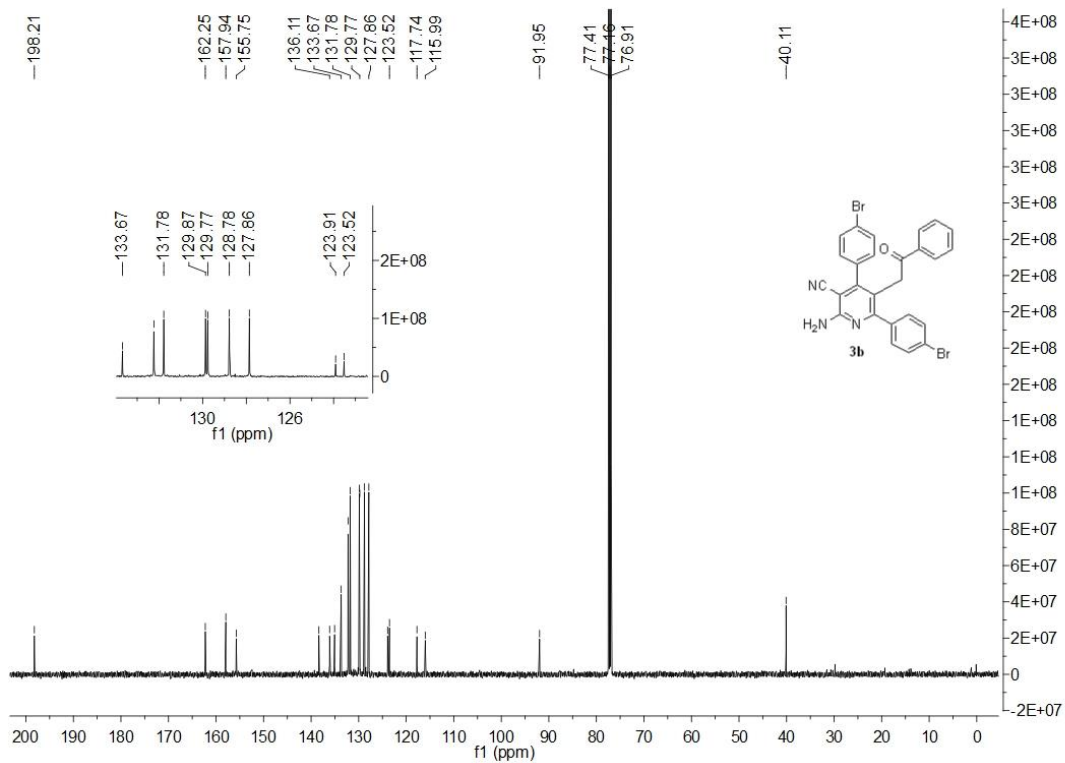

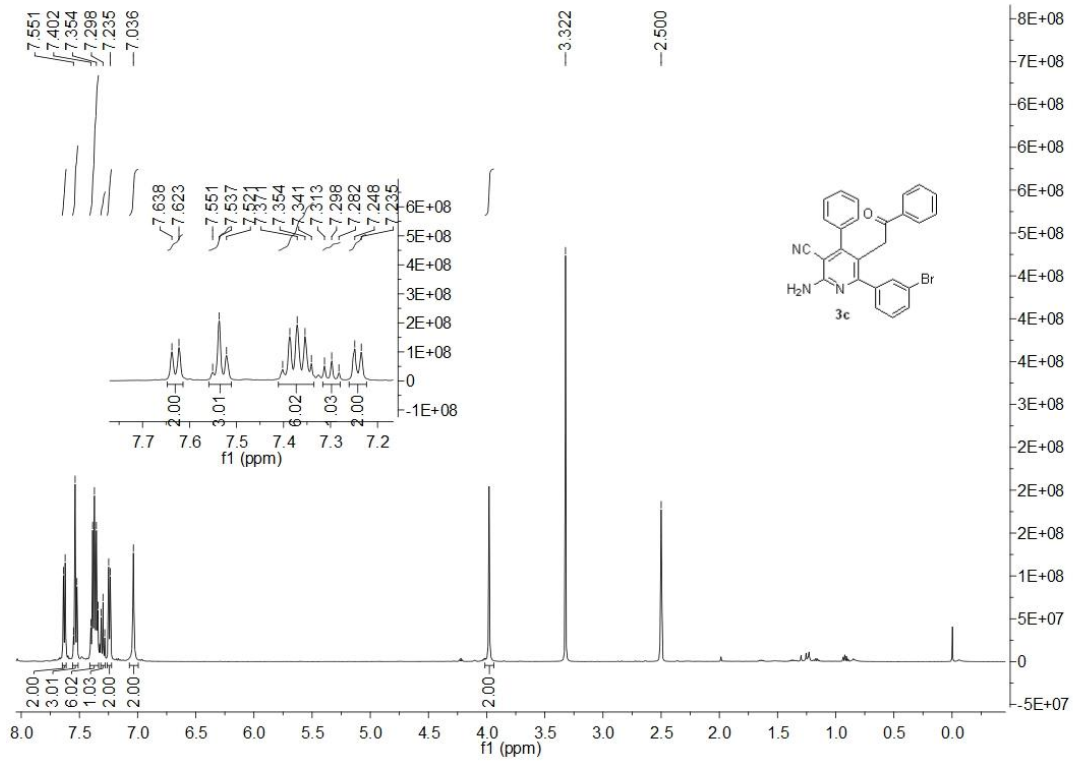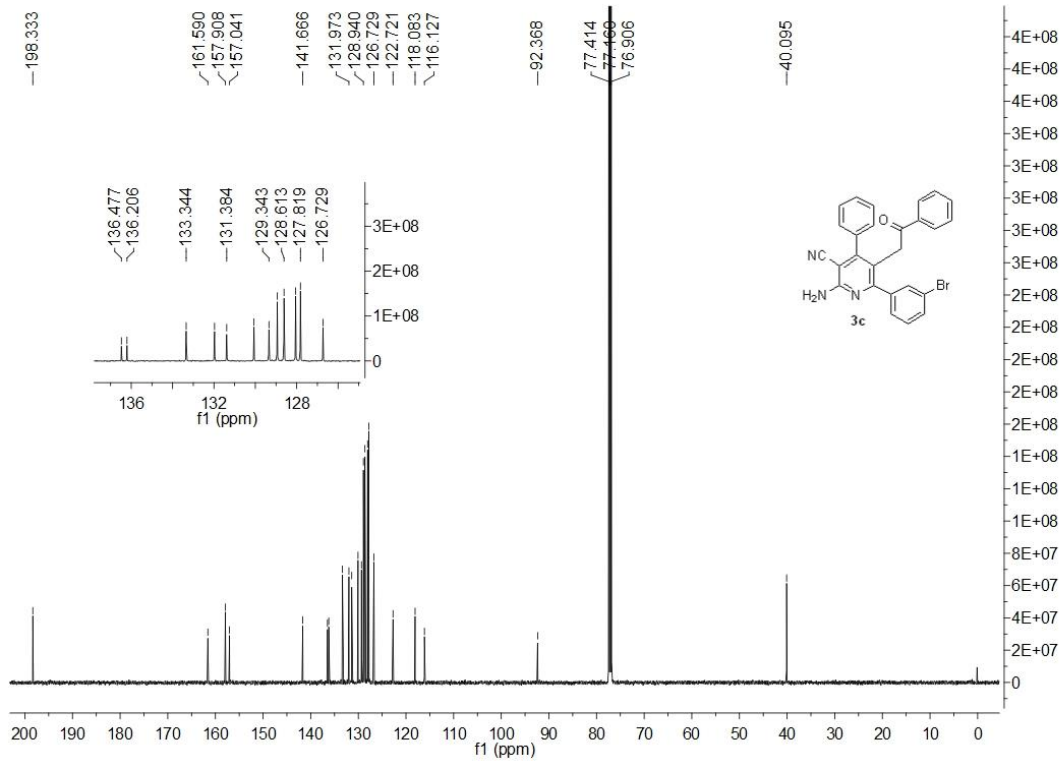



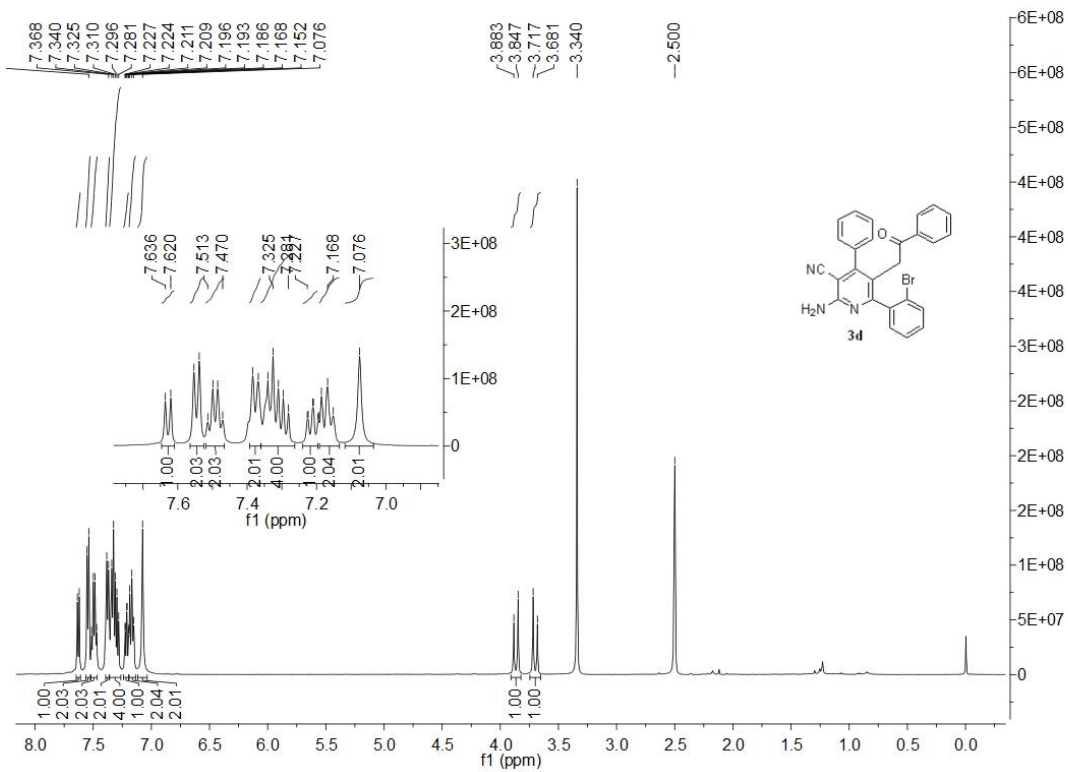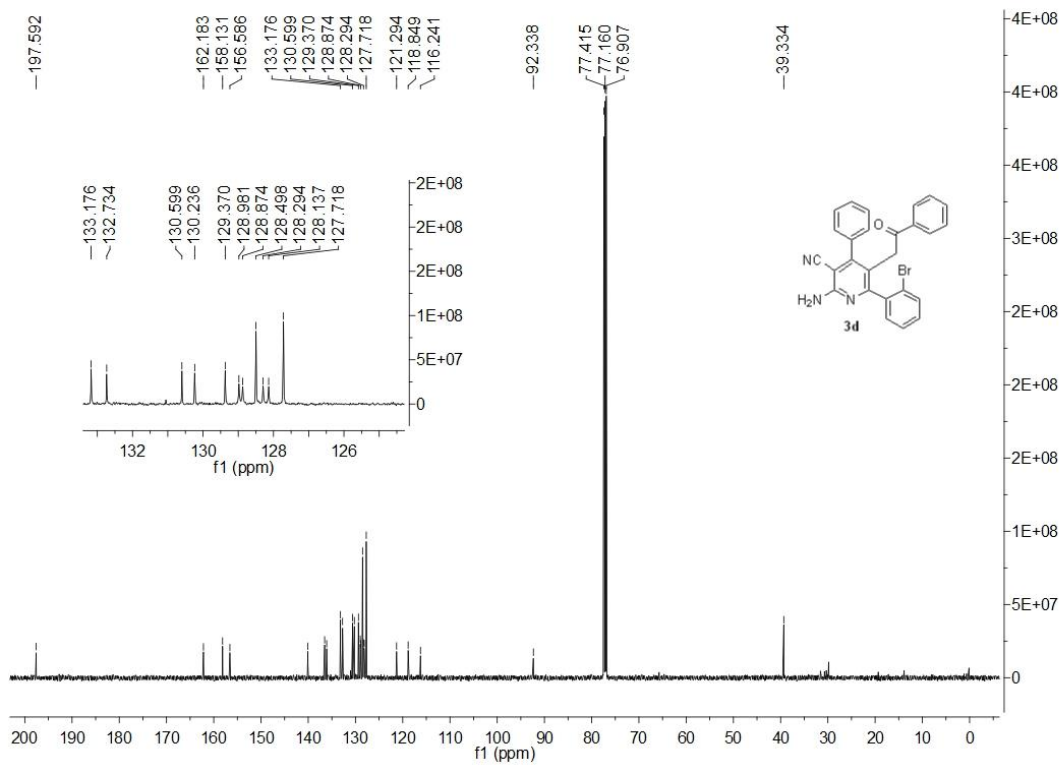

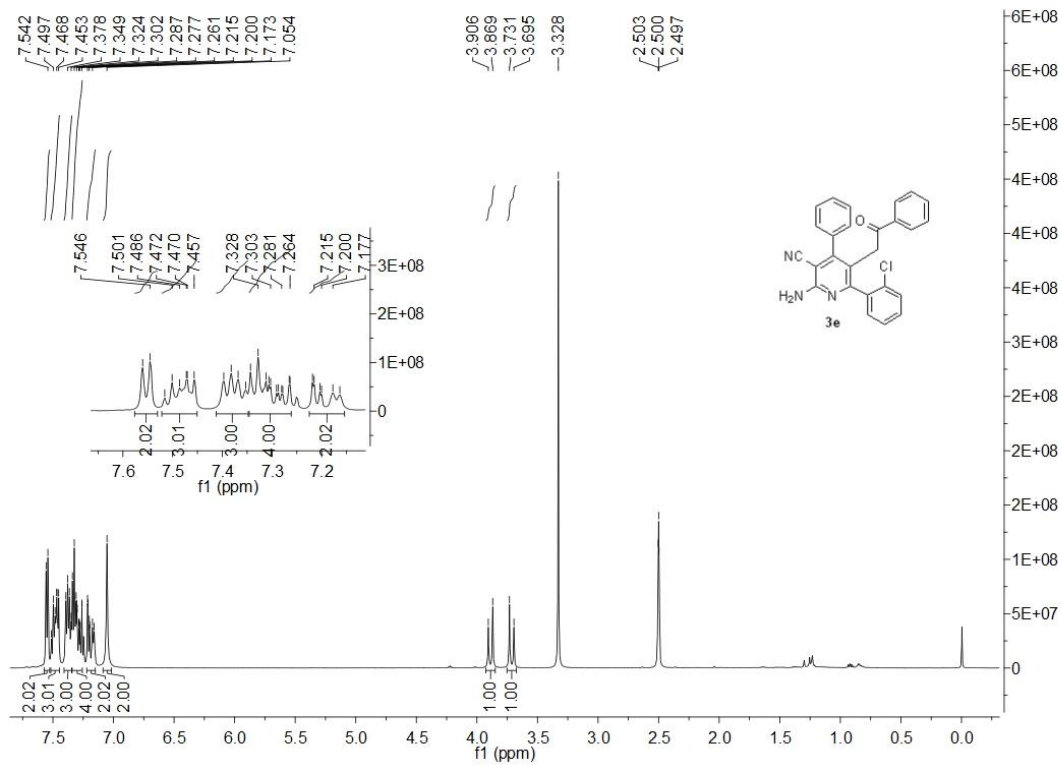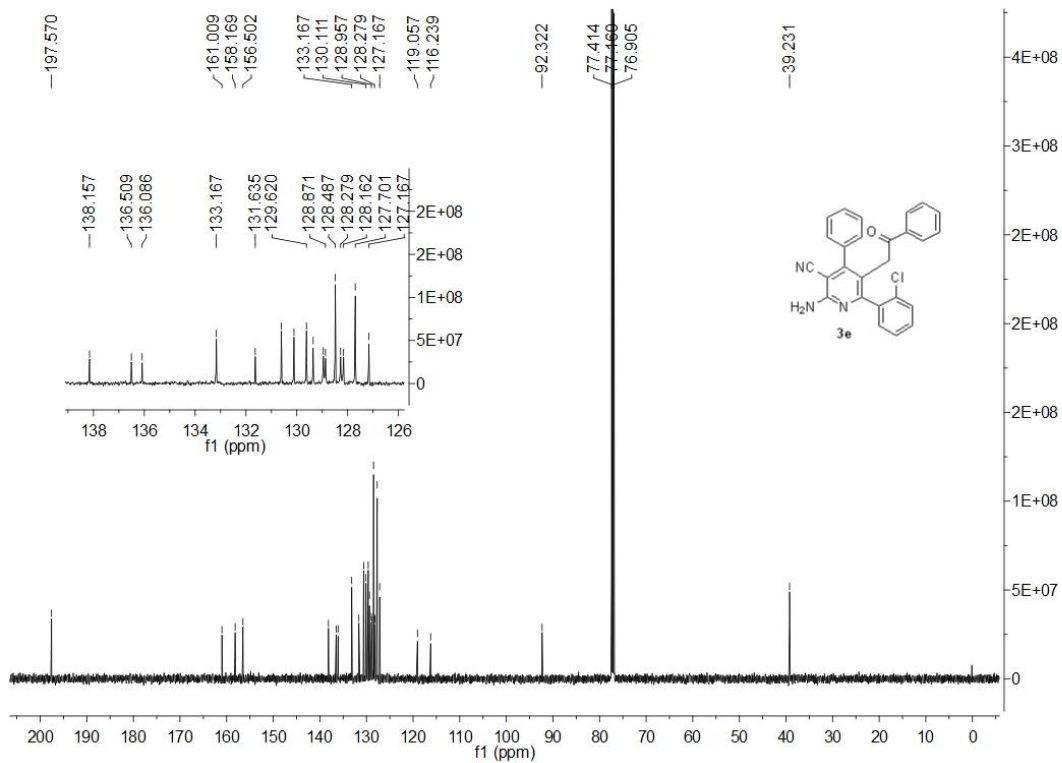

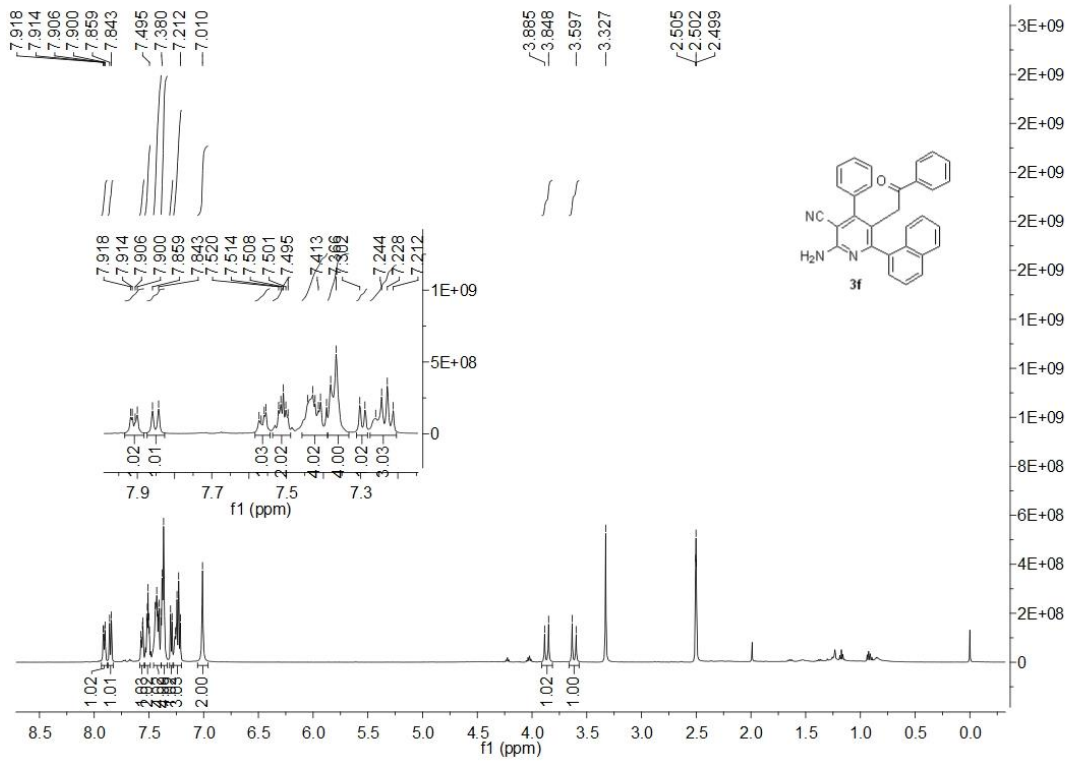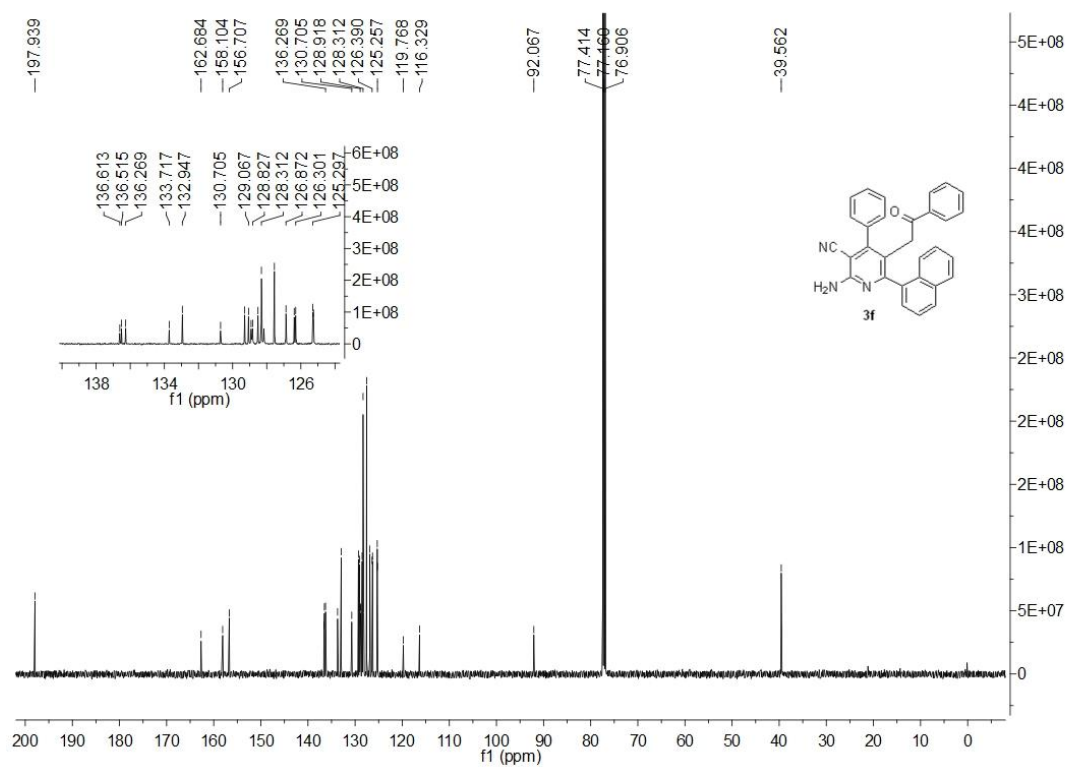

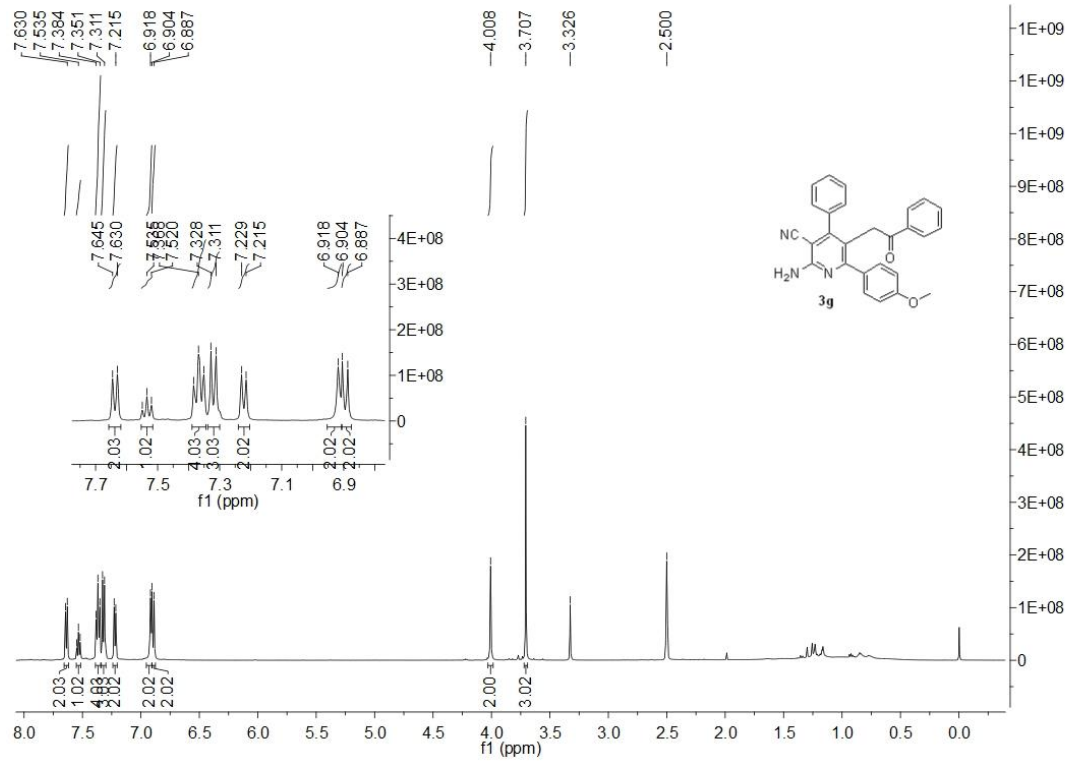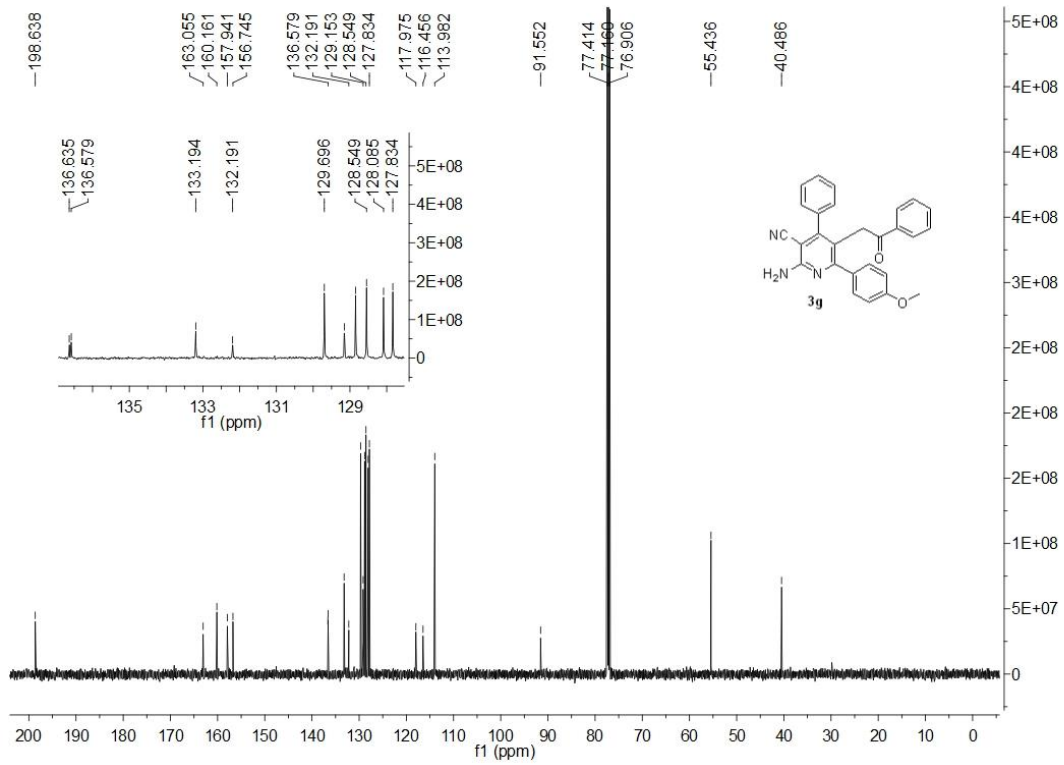



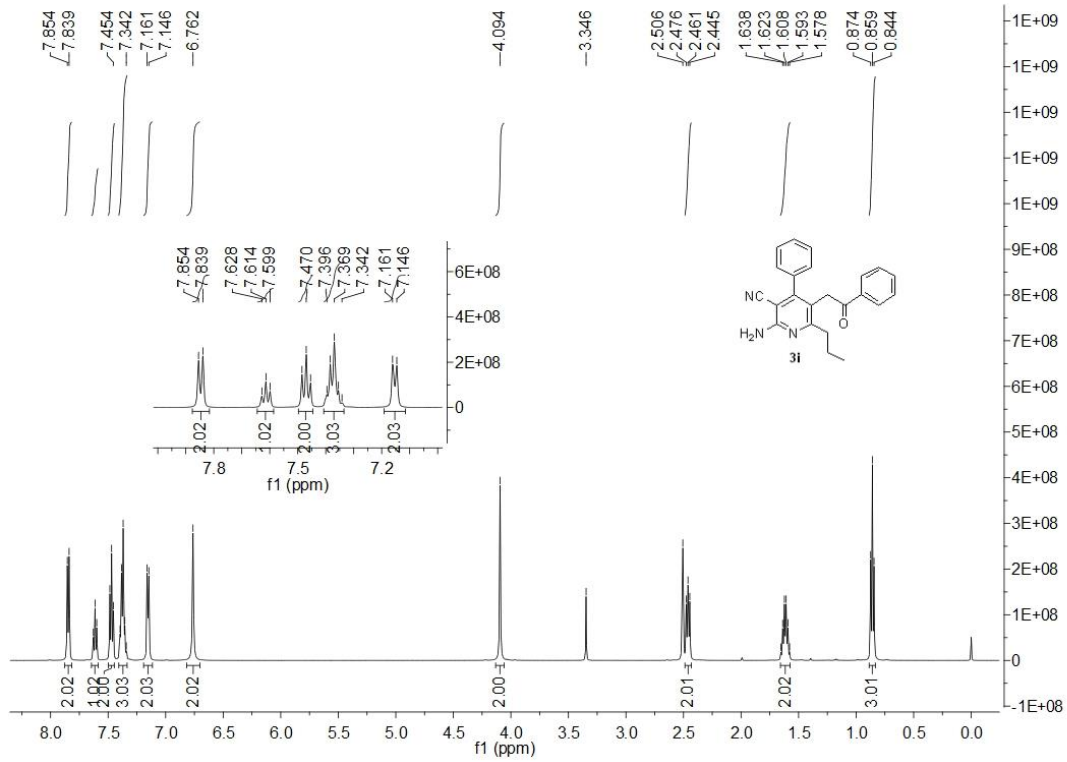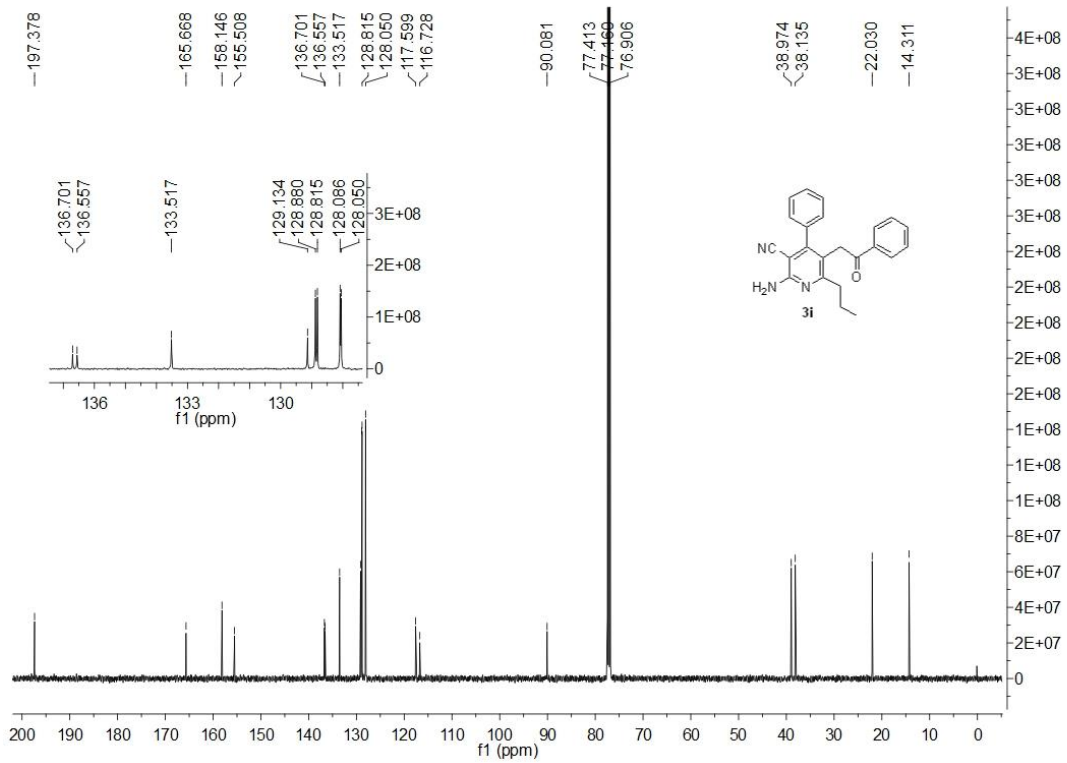

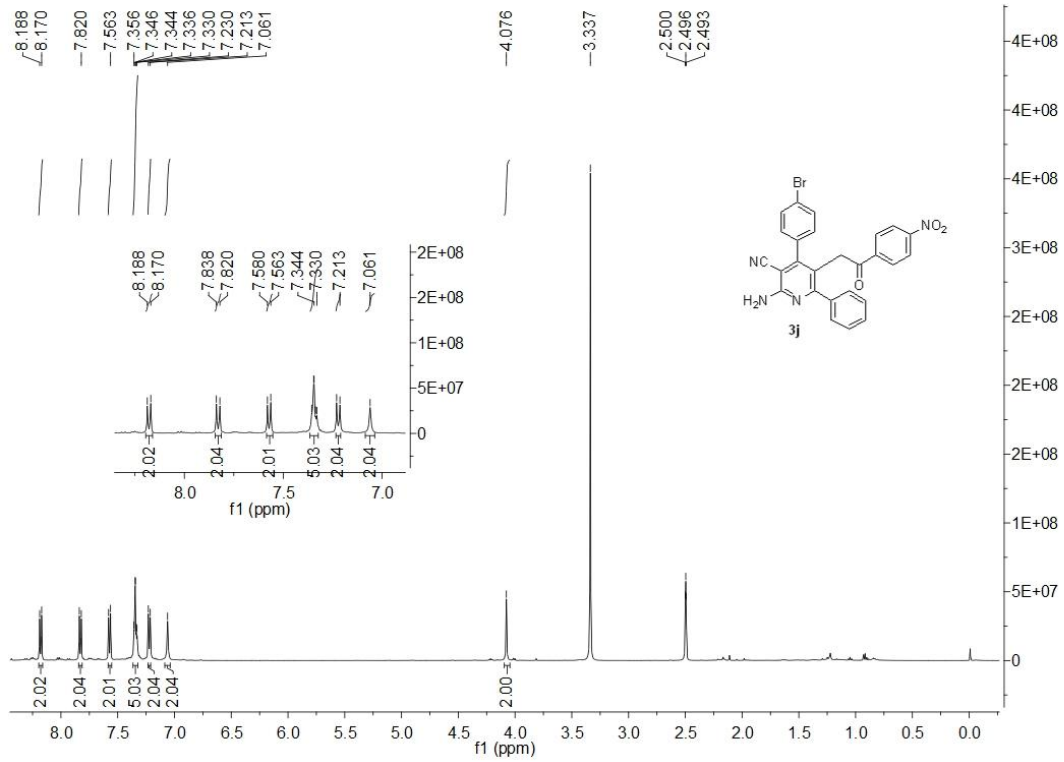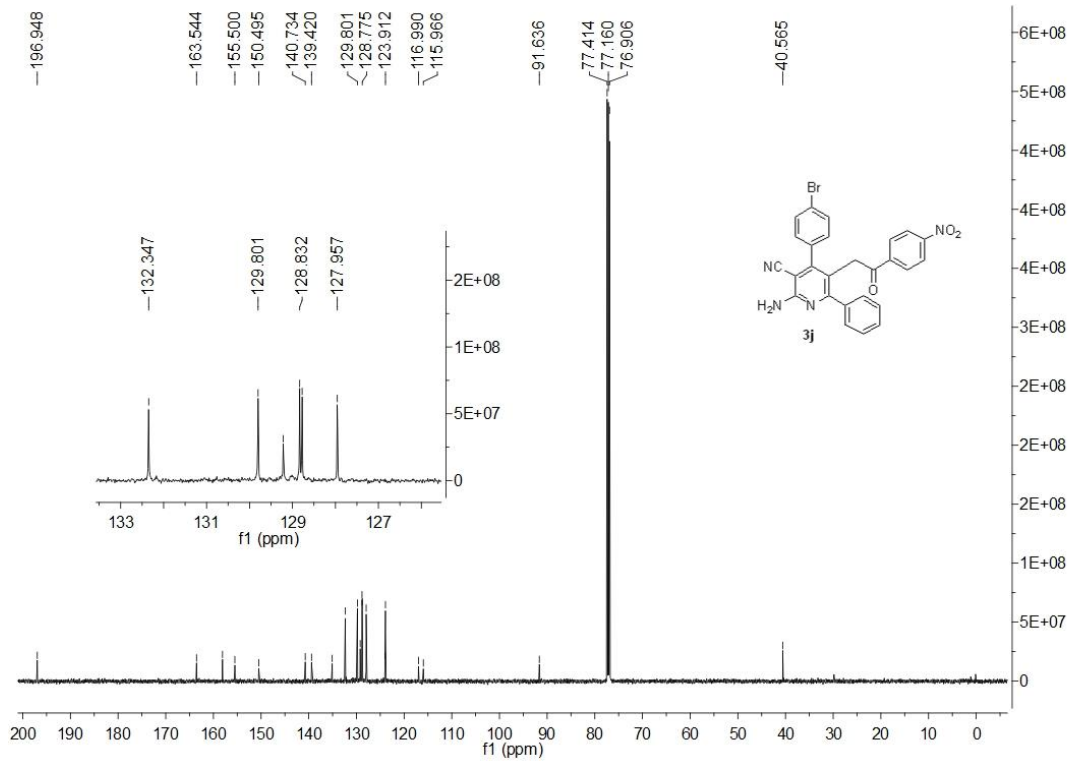

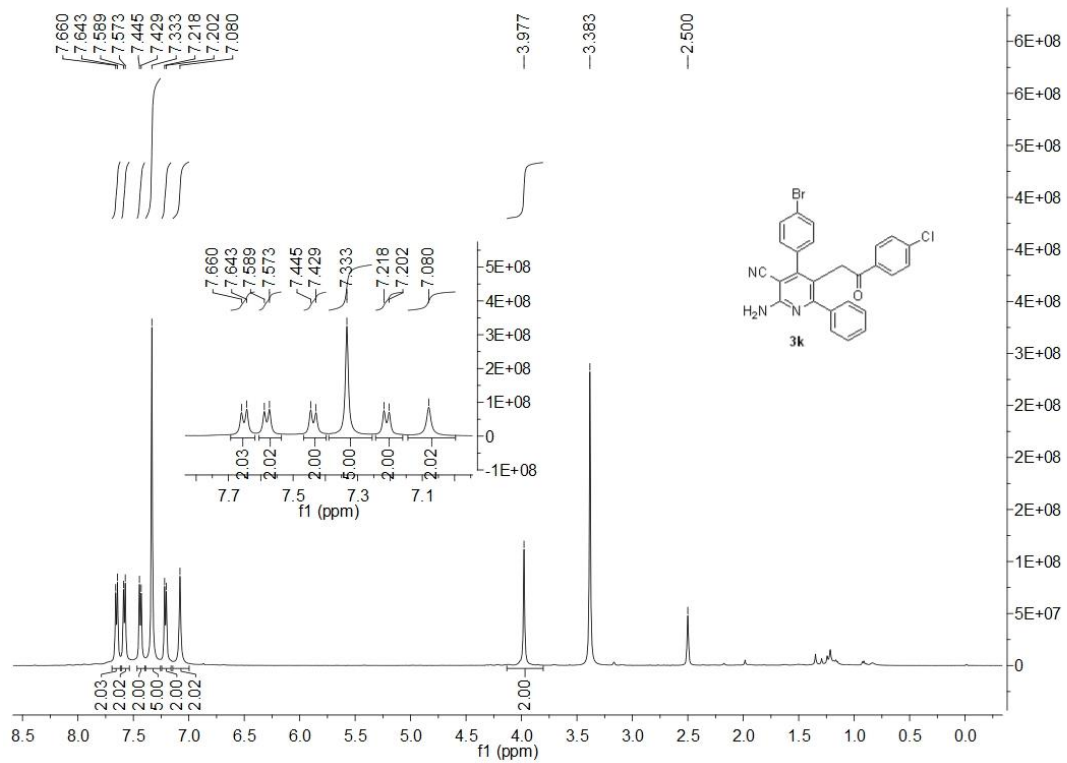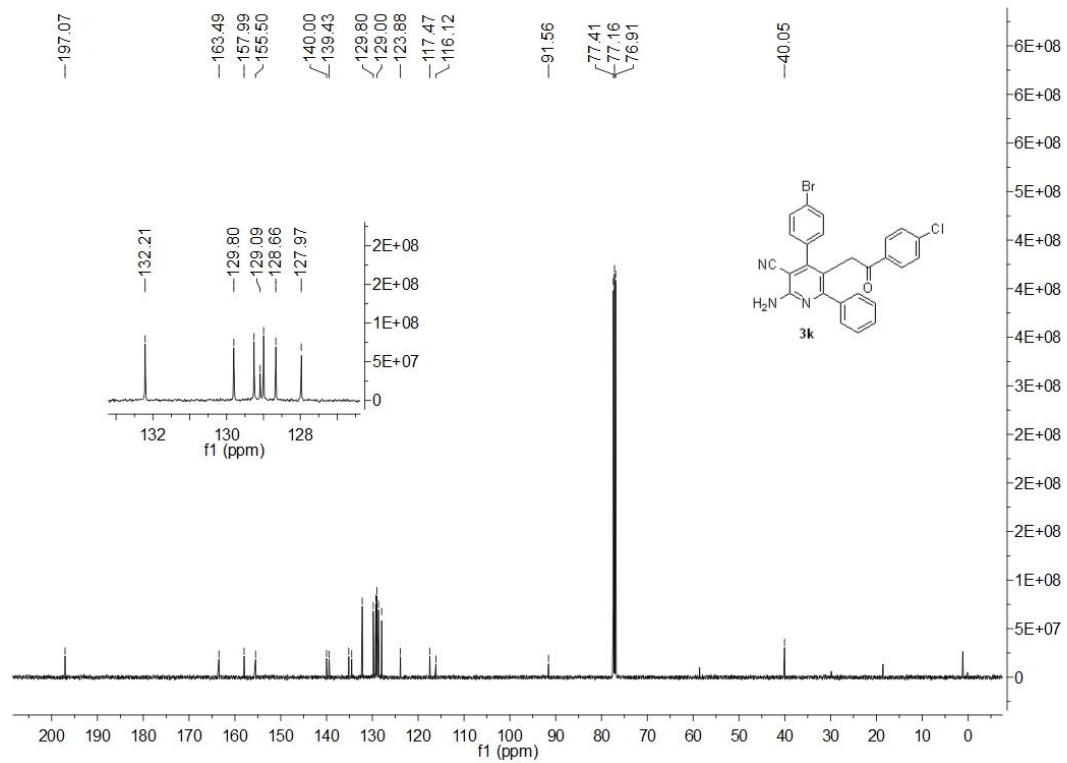



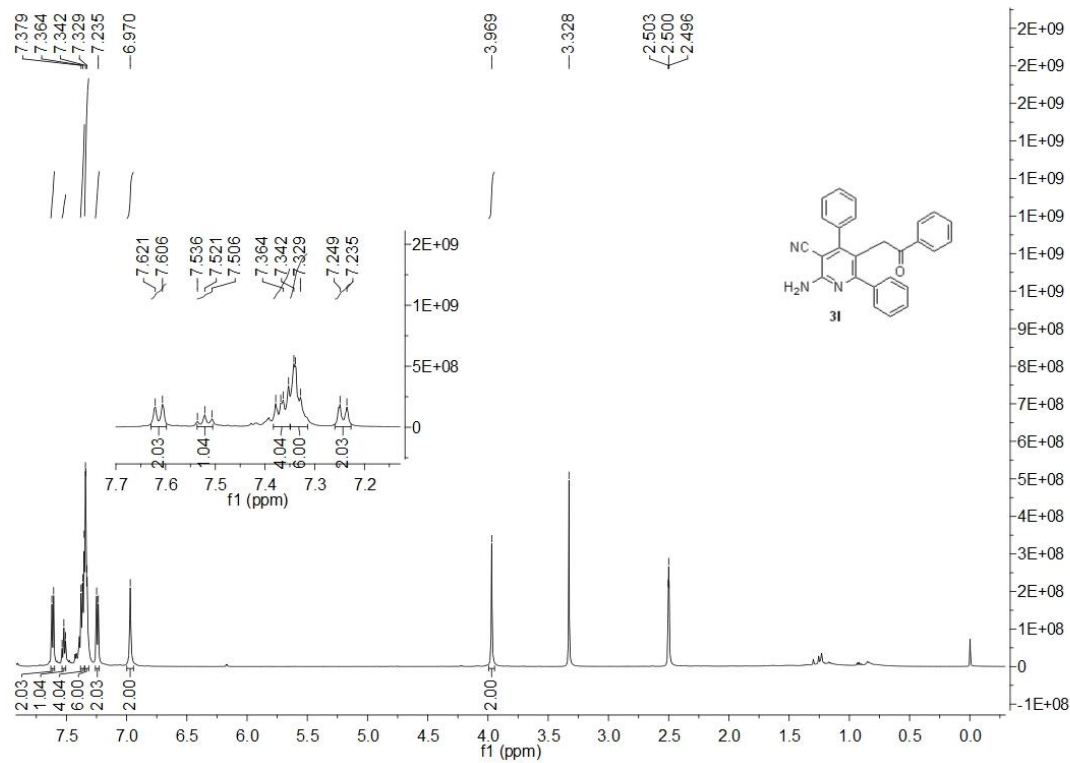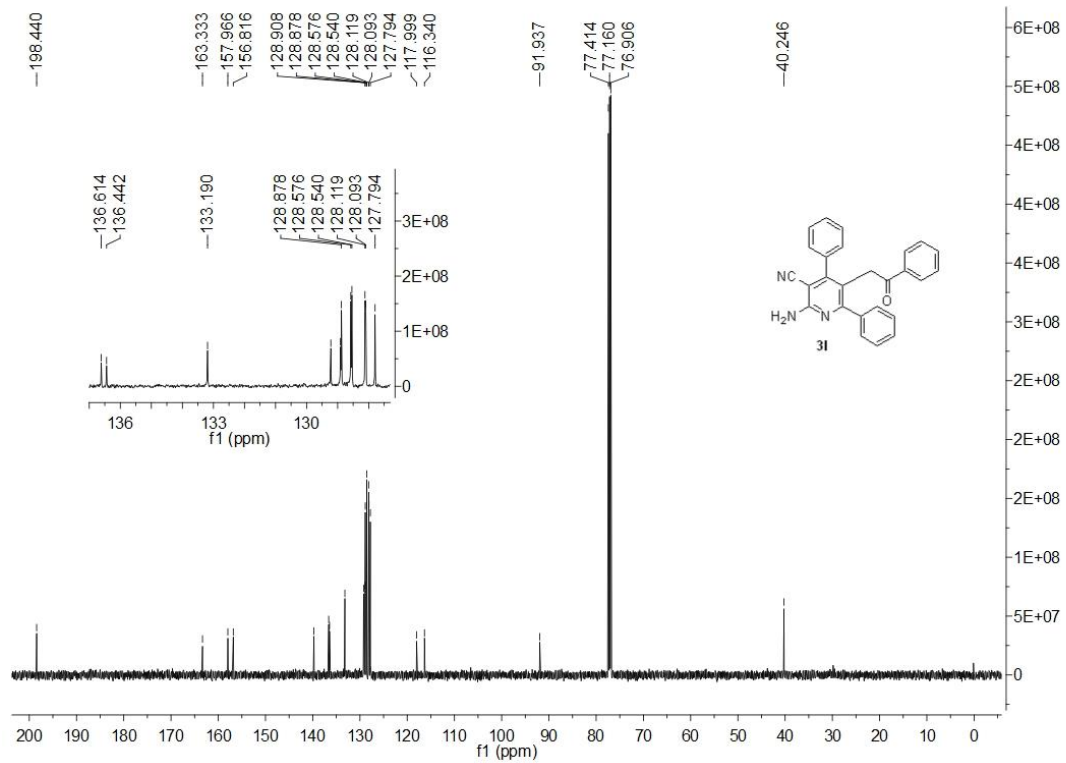

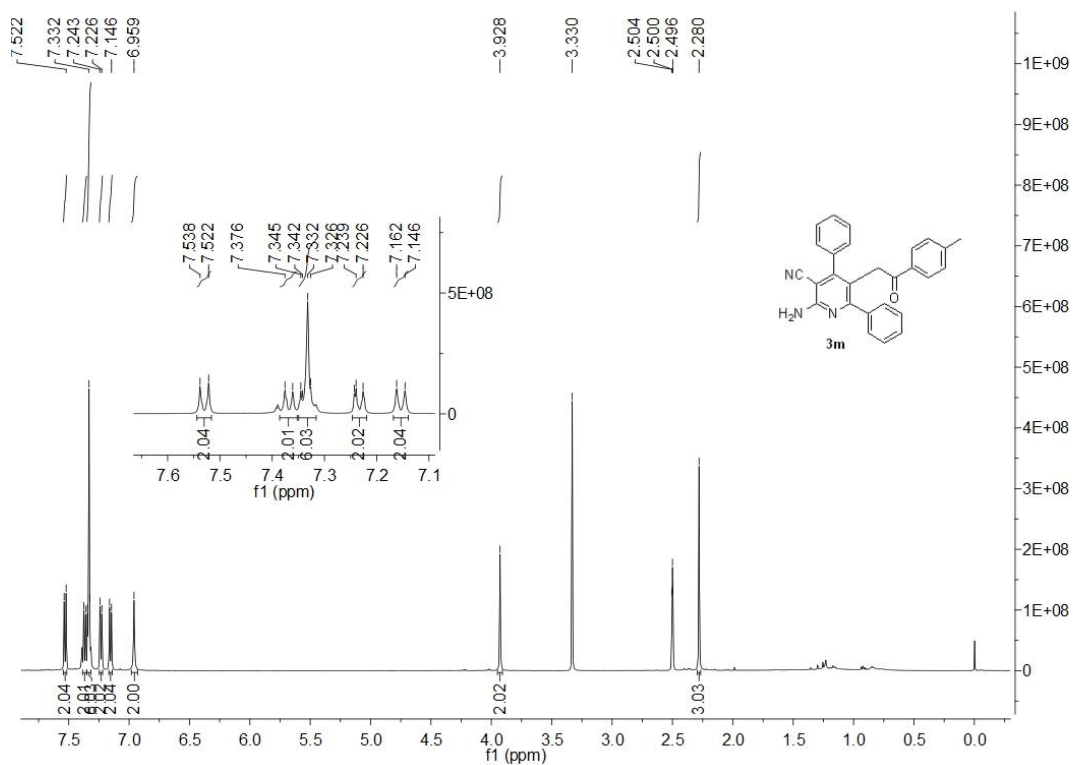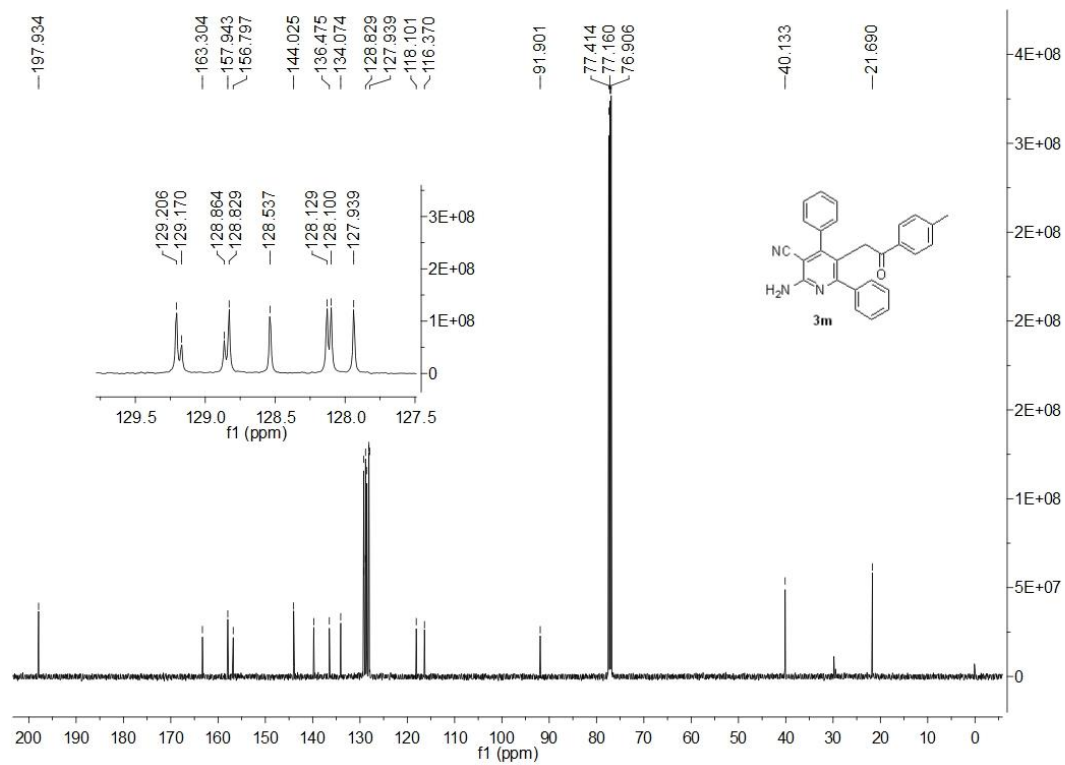

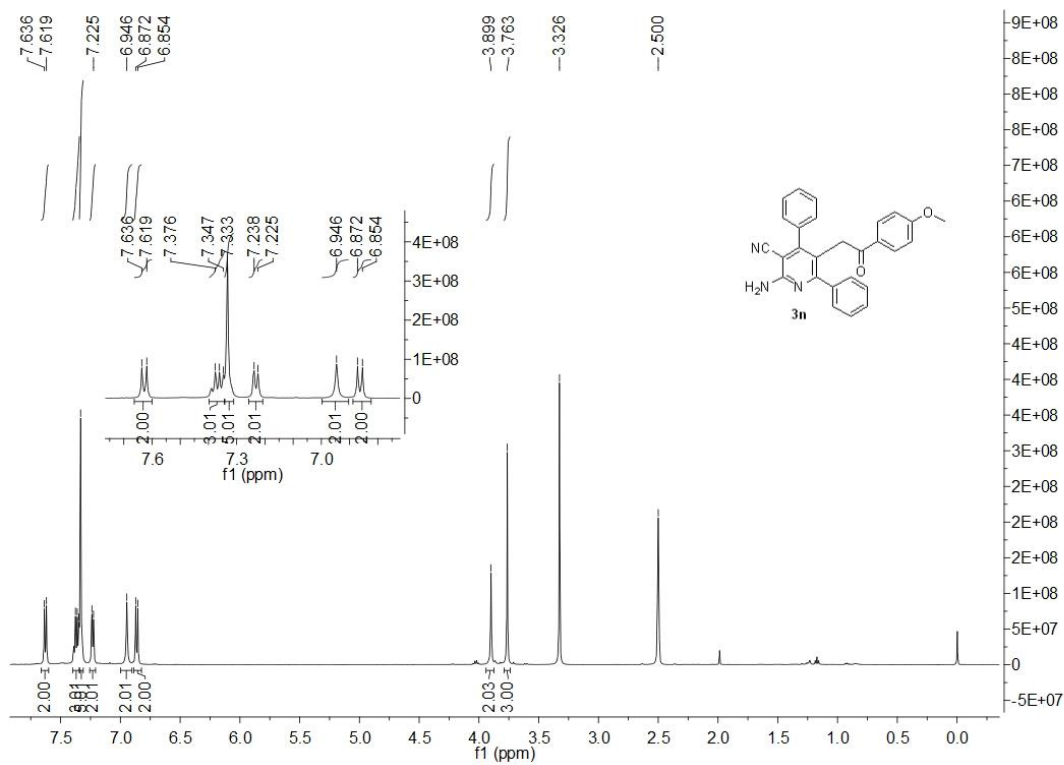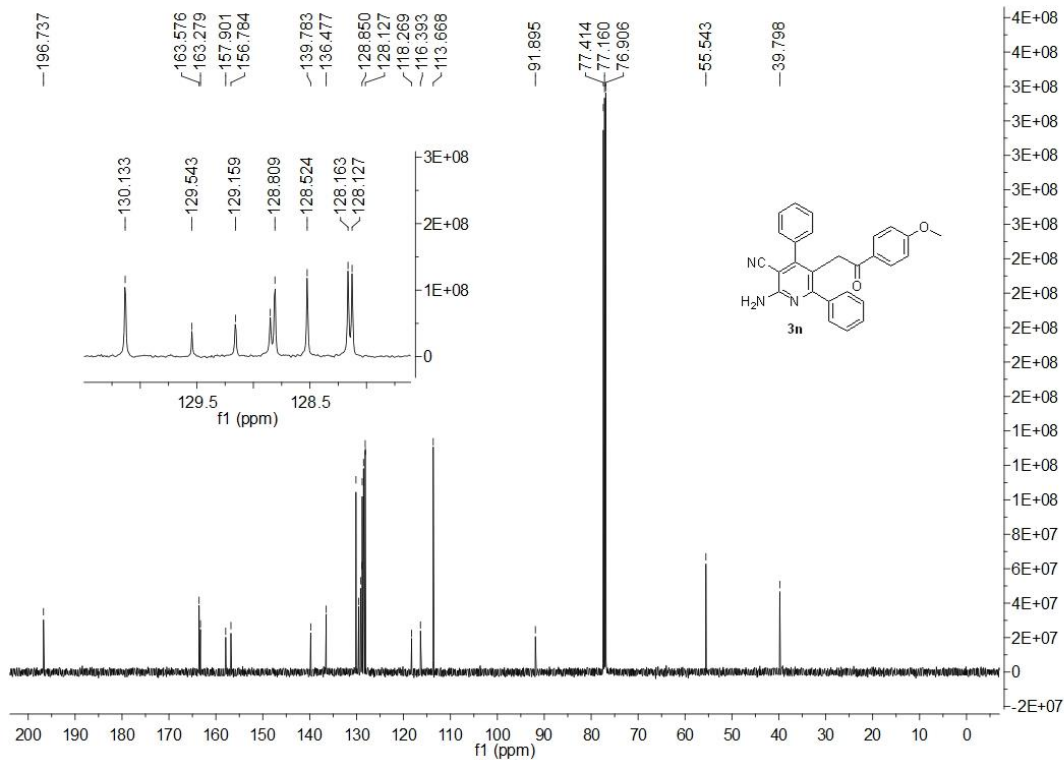

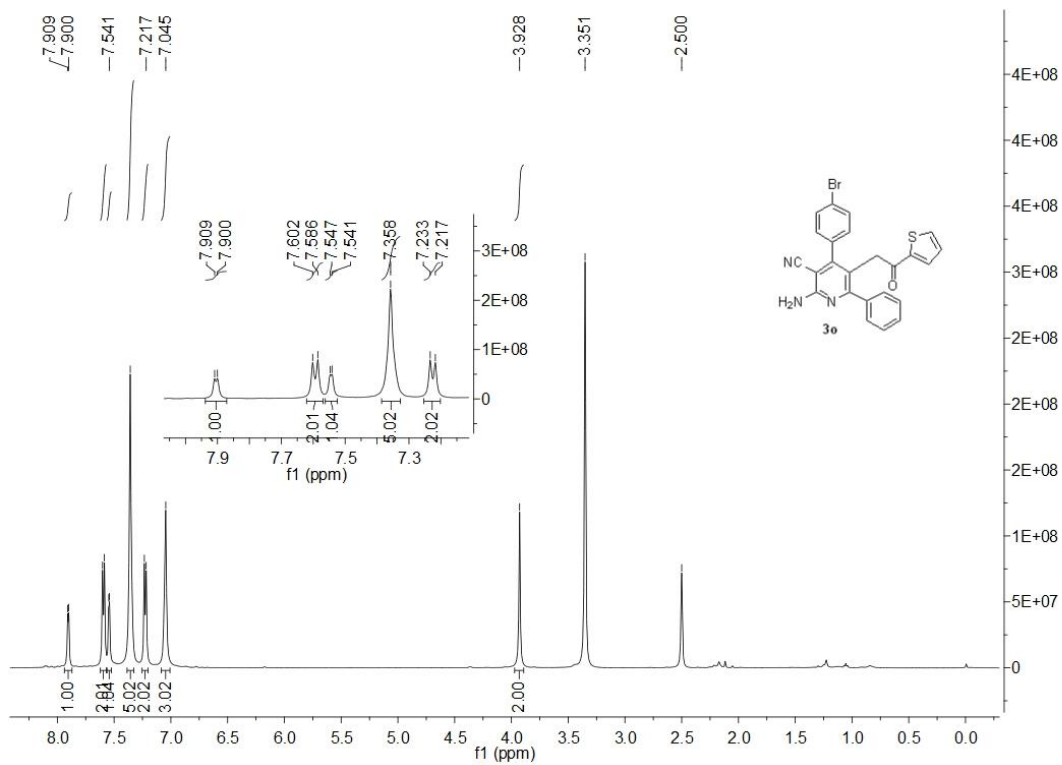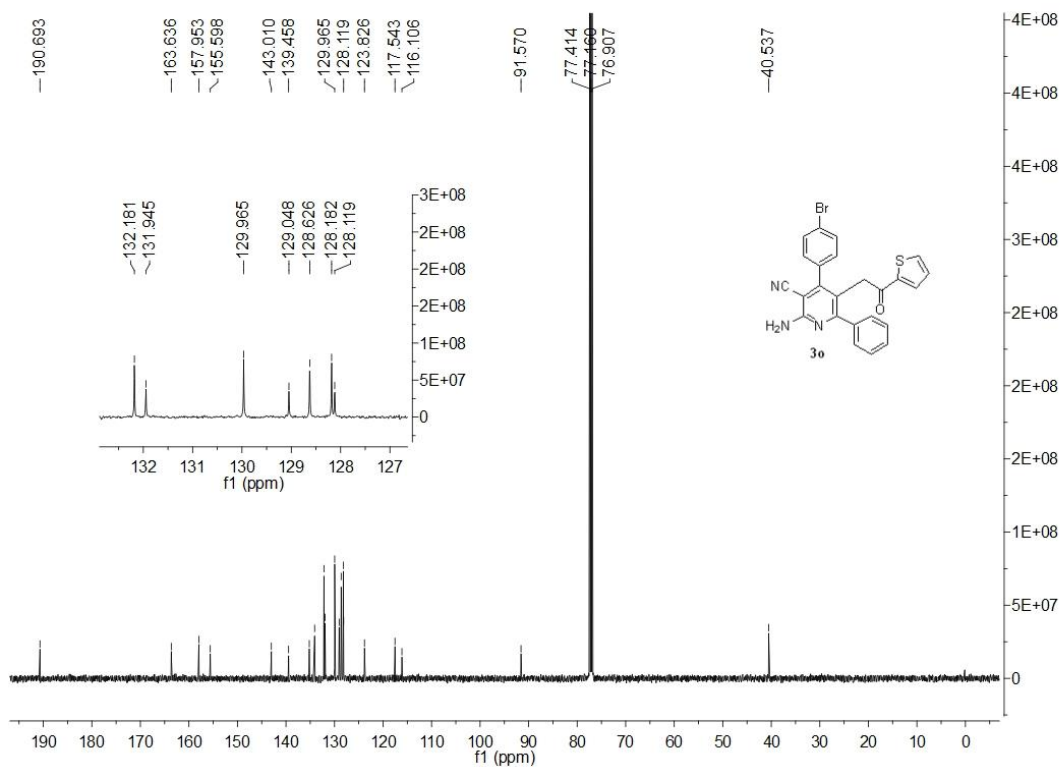

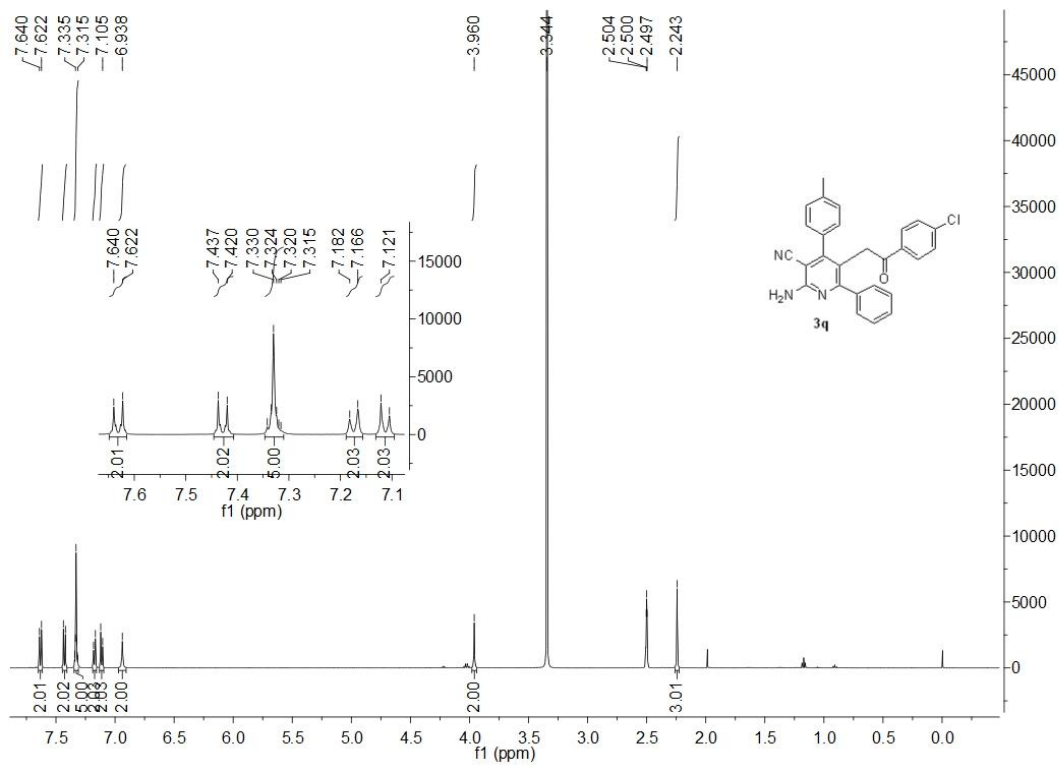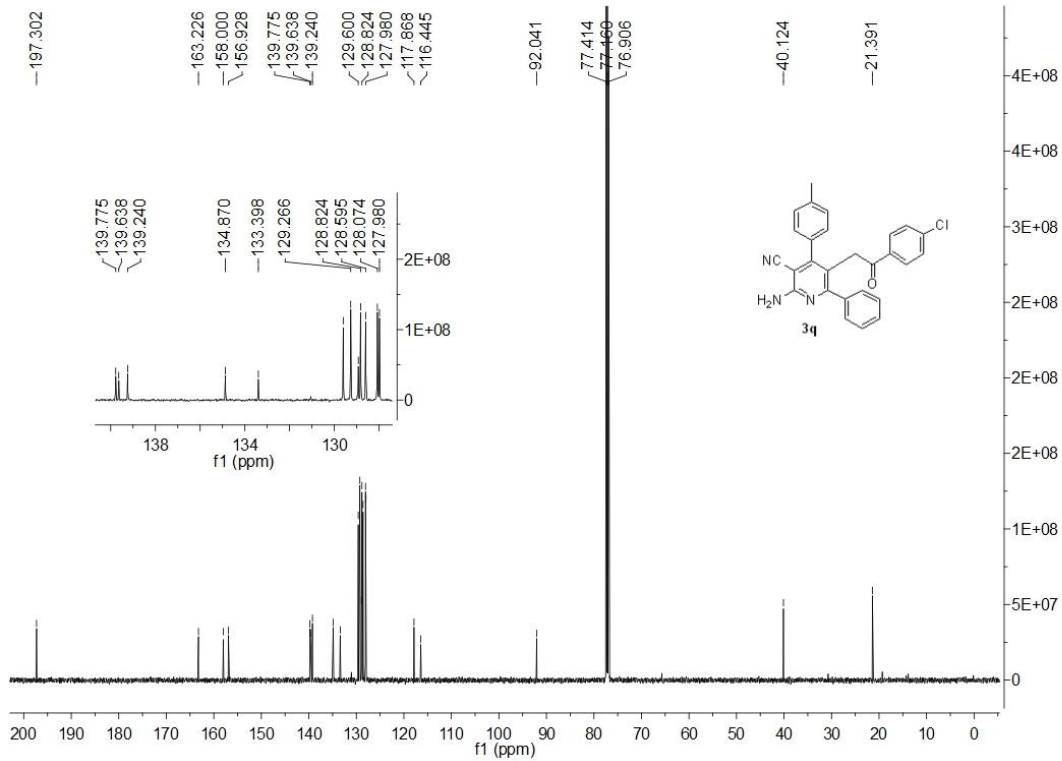

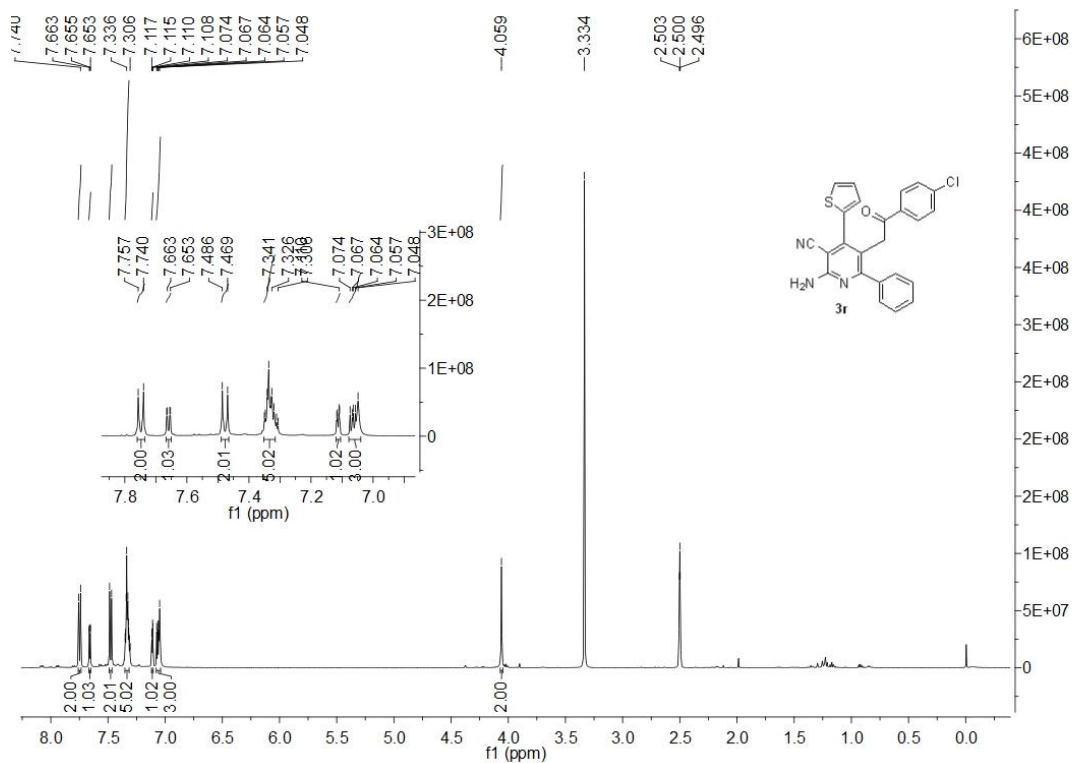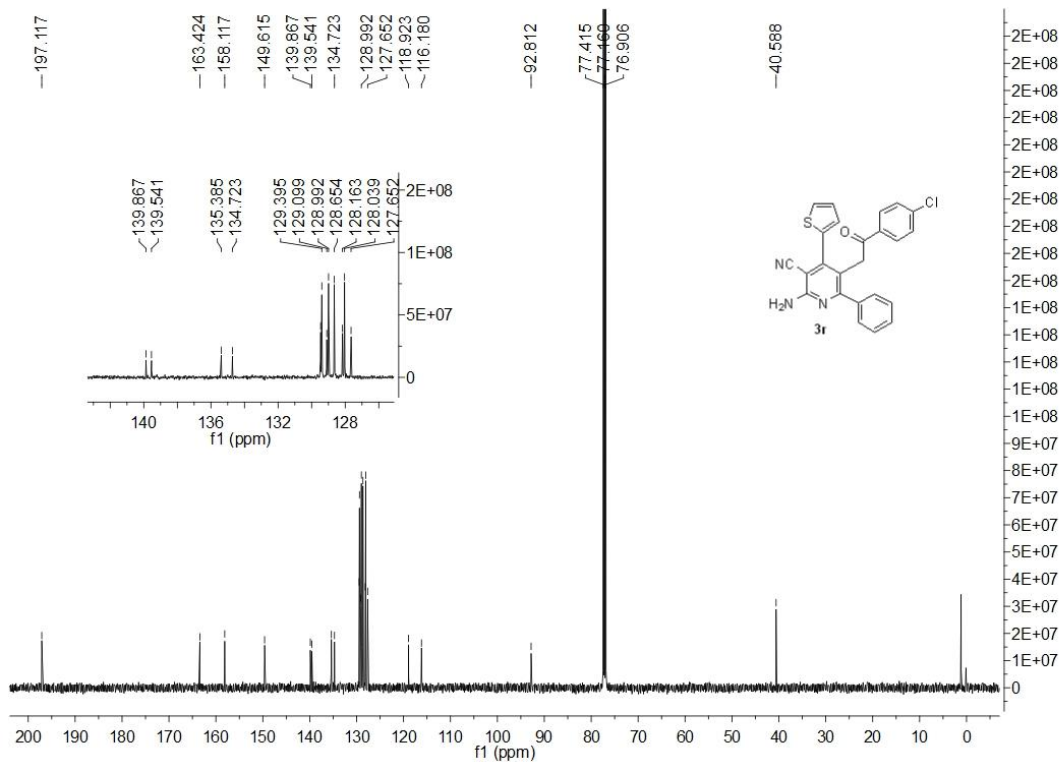

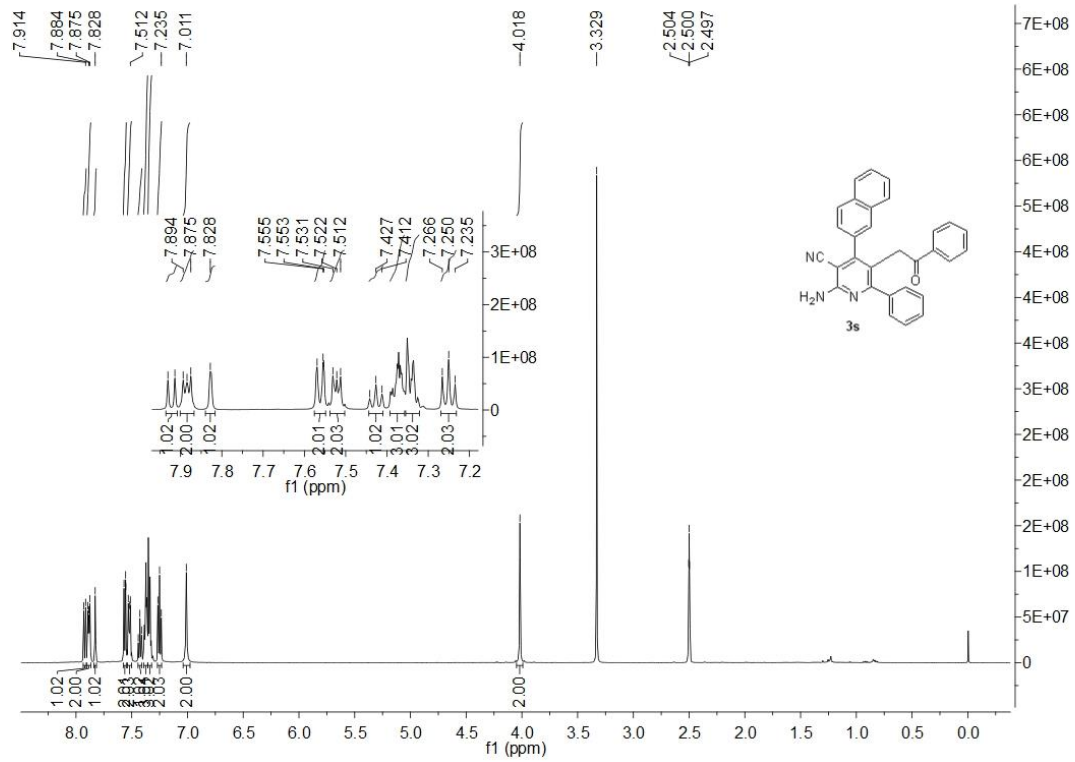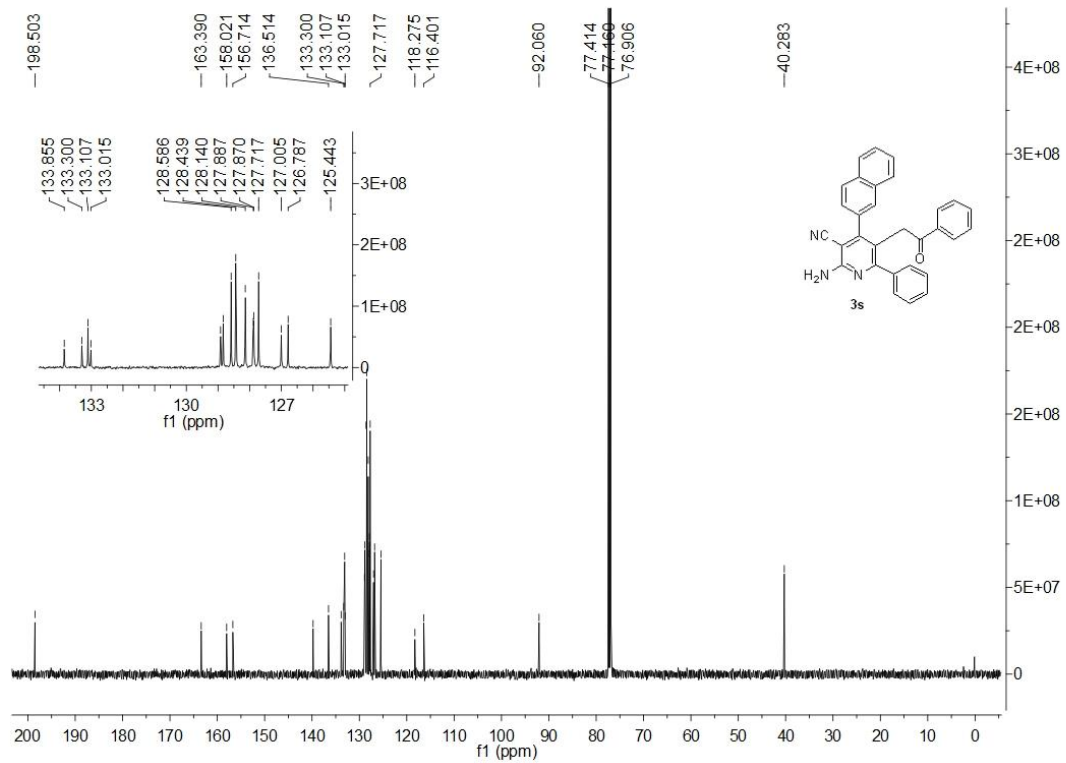

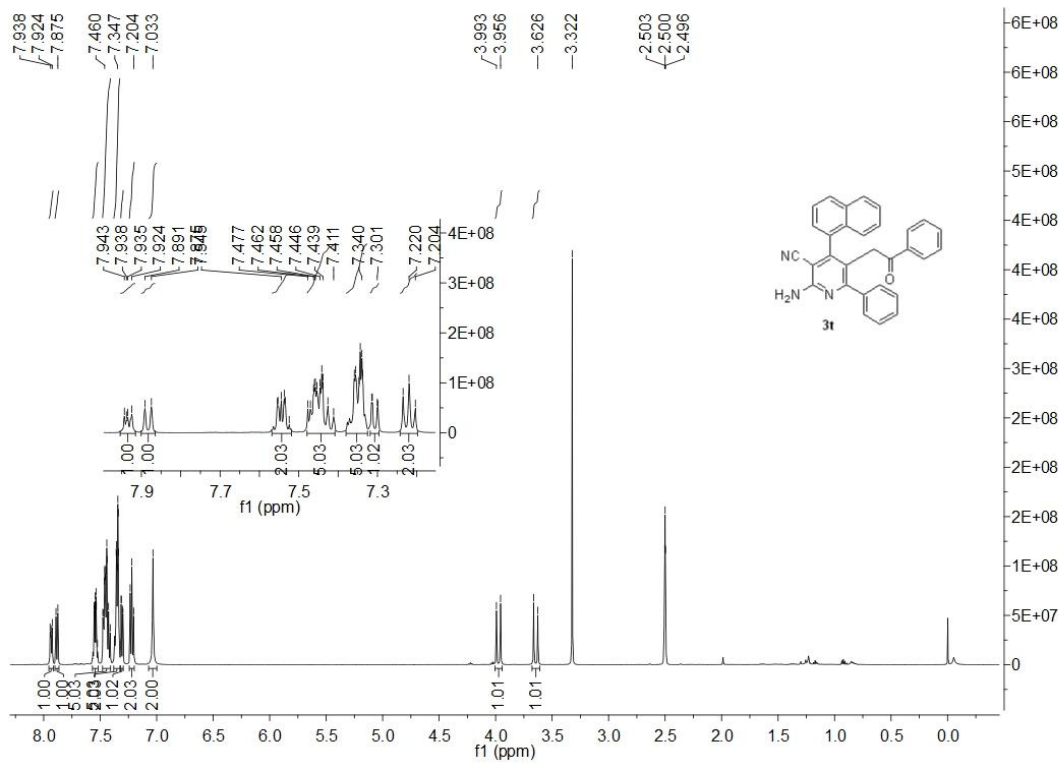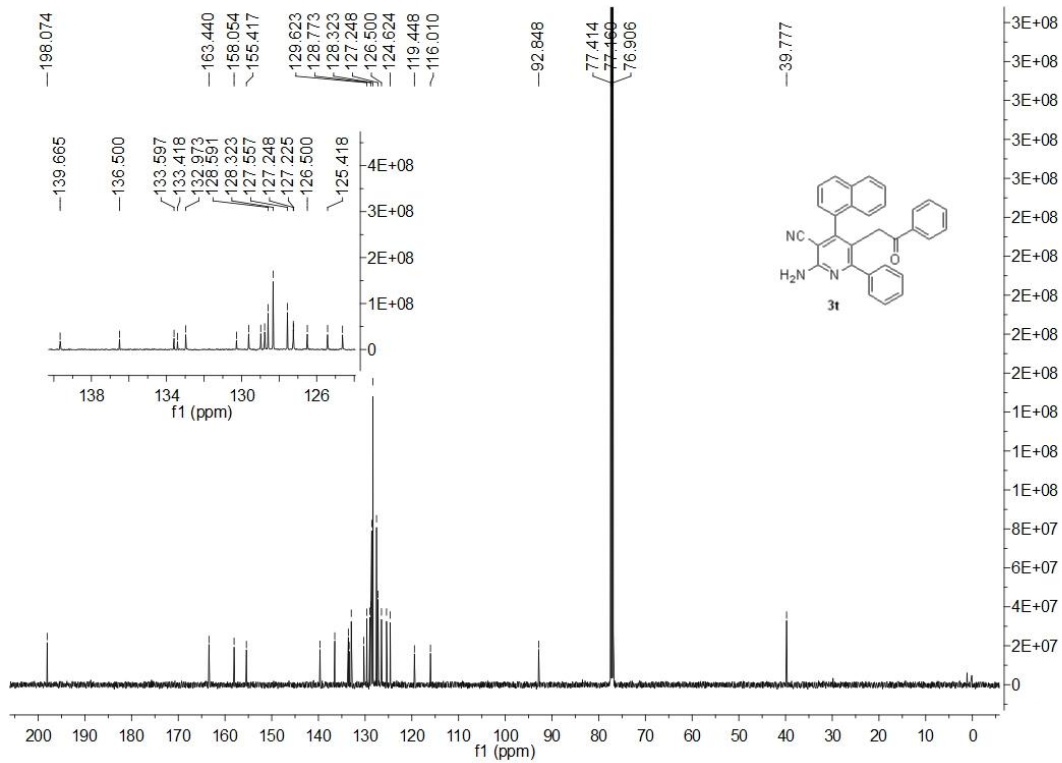



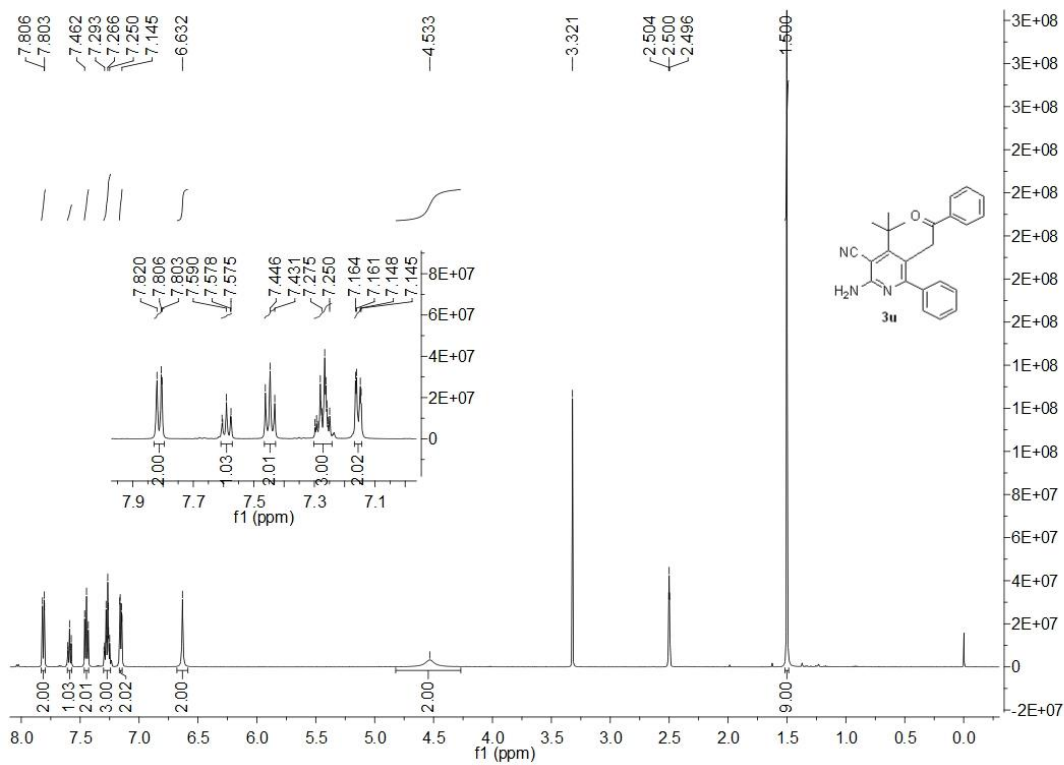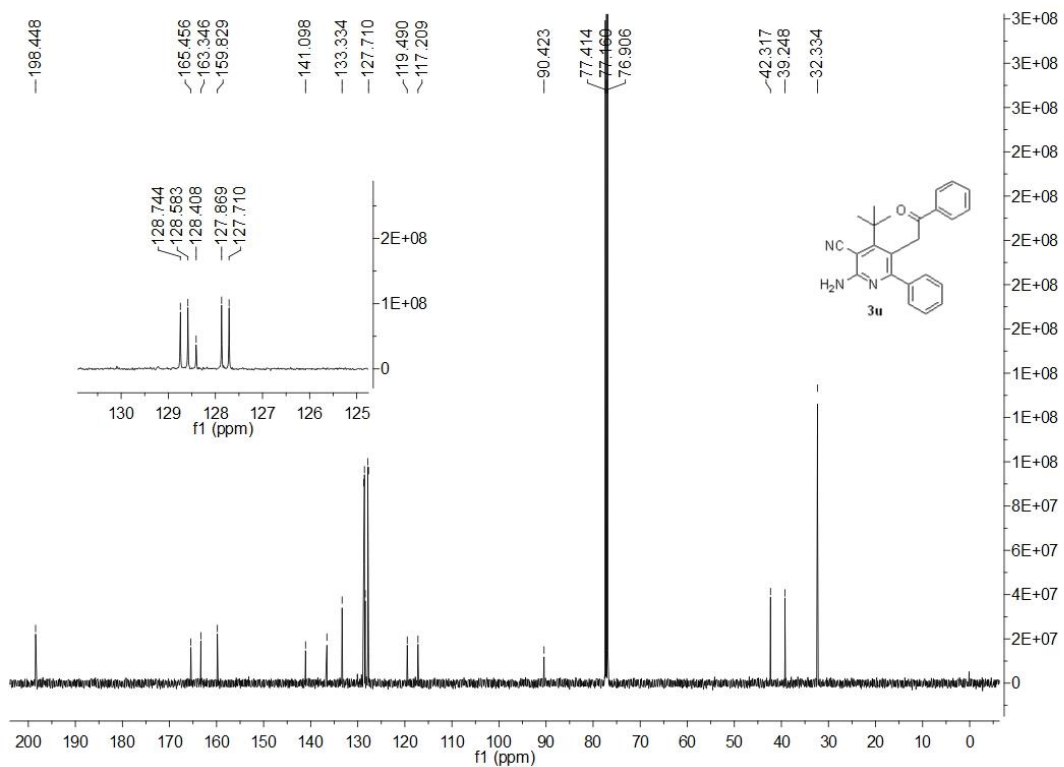

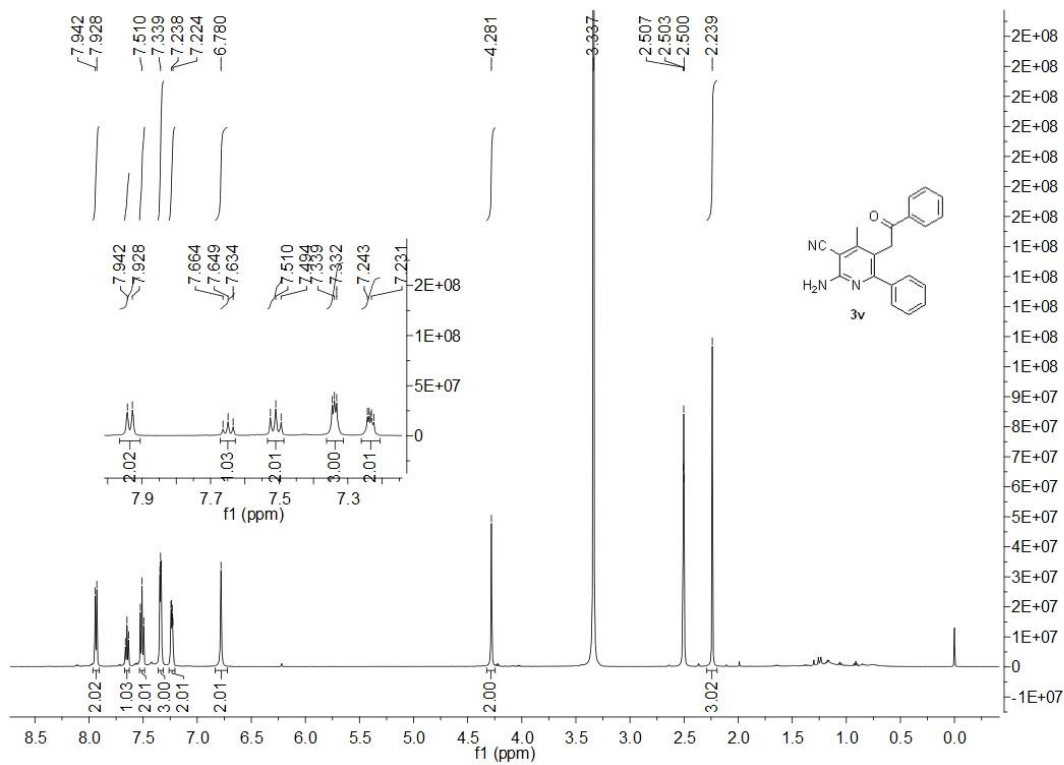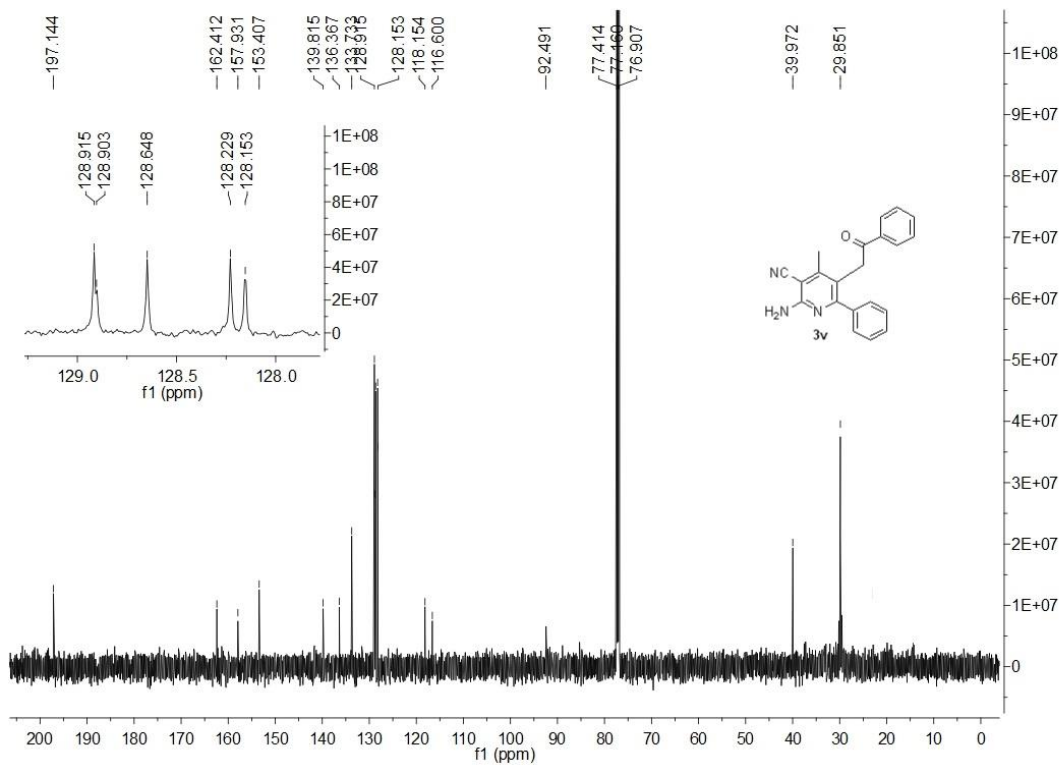

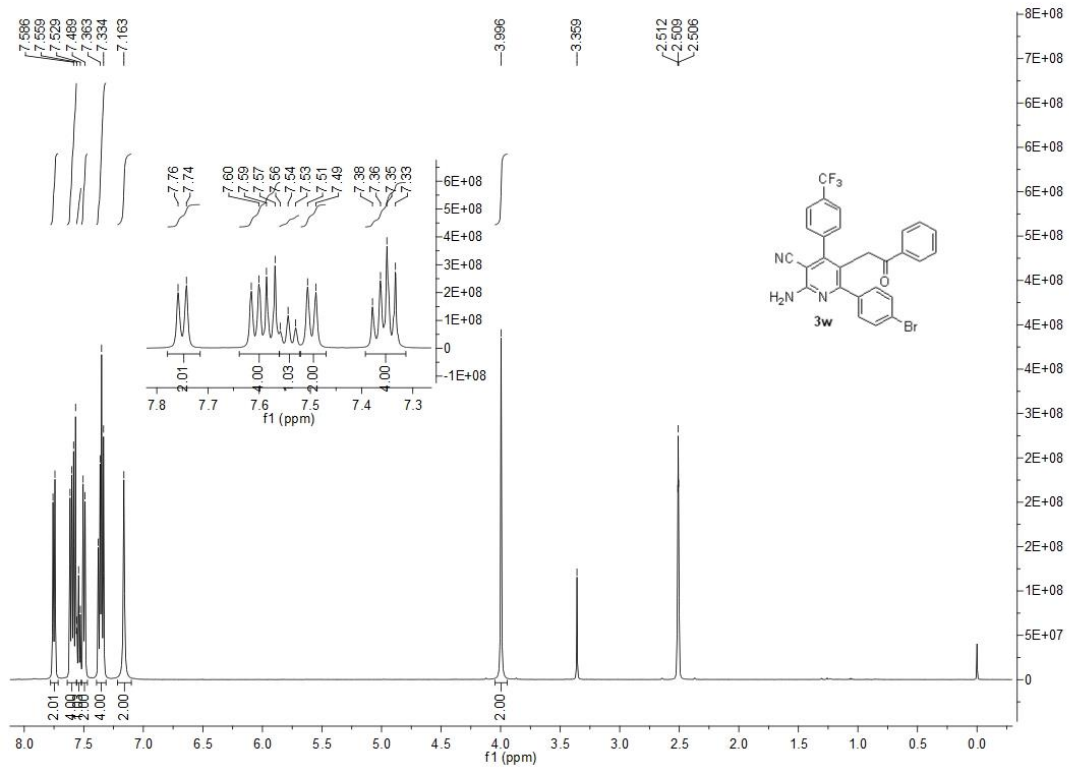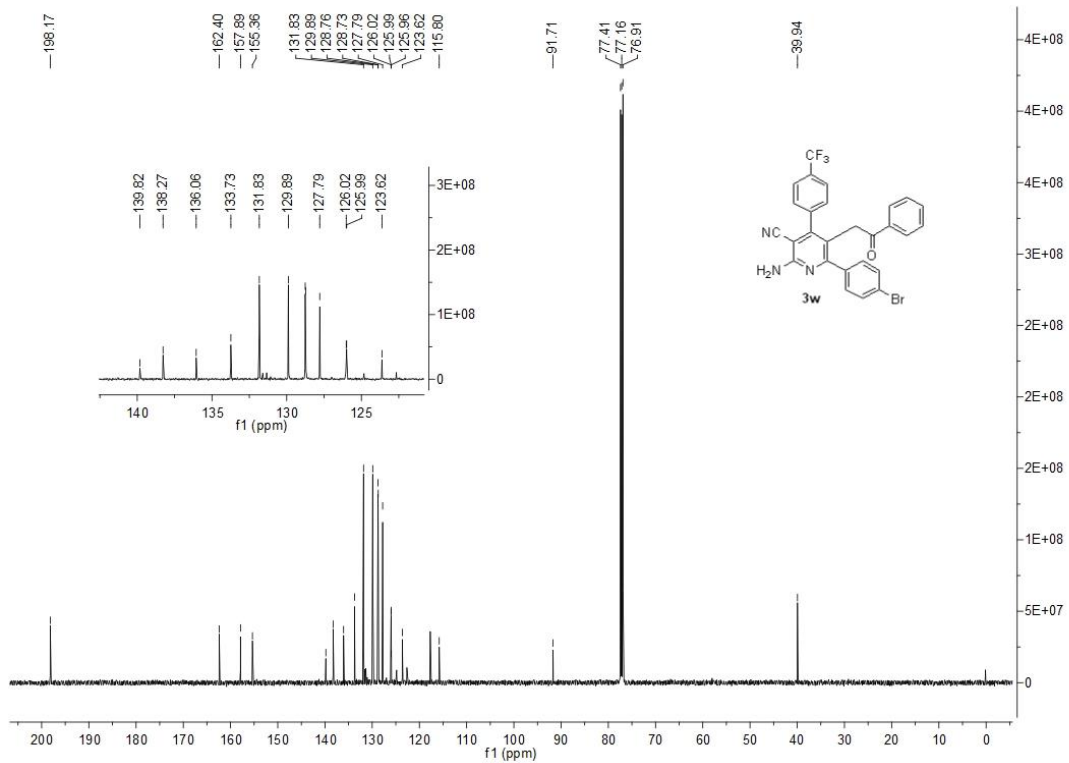



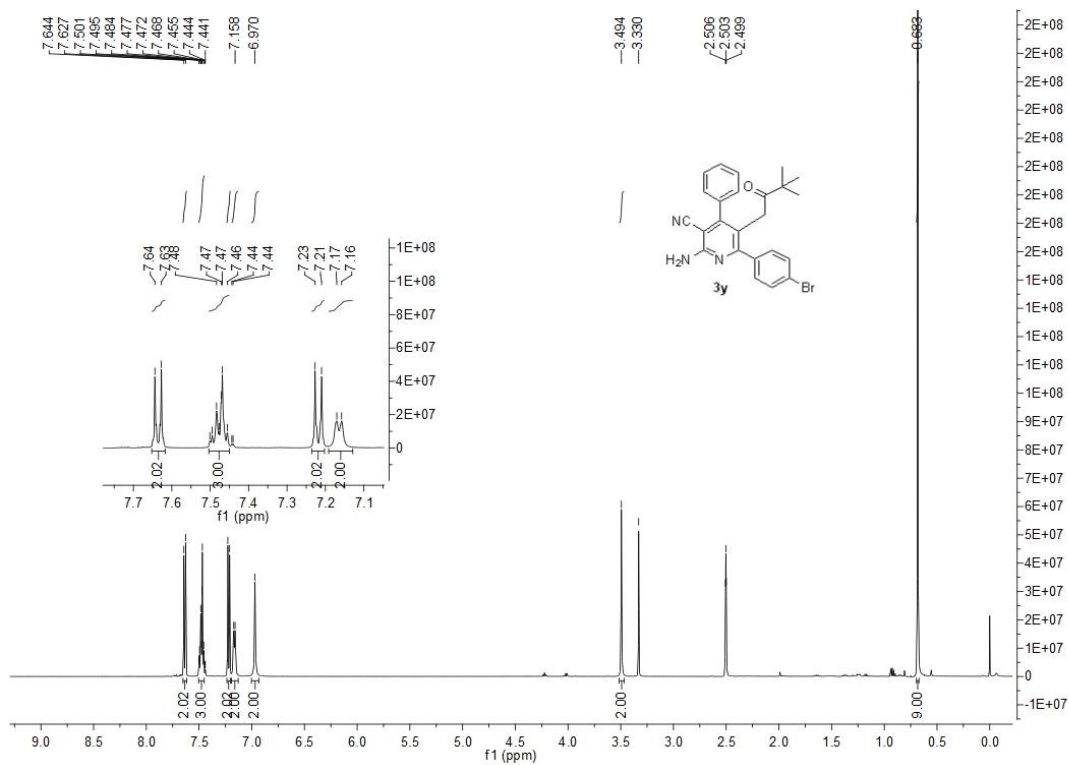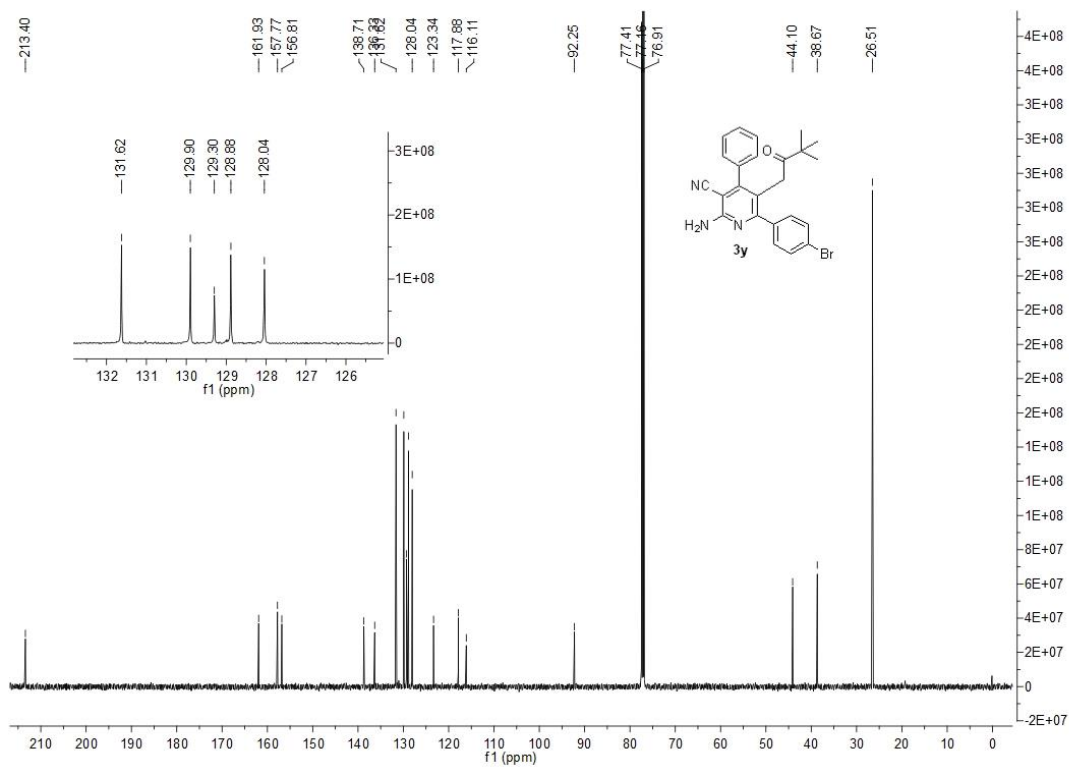

## $^{13}\text{C}$ - $^1\text{H}$ HMBC Spectrograms of **3v**

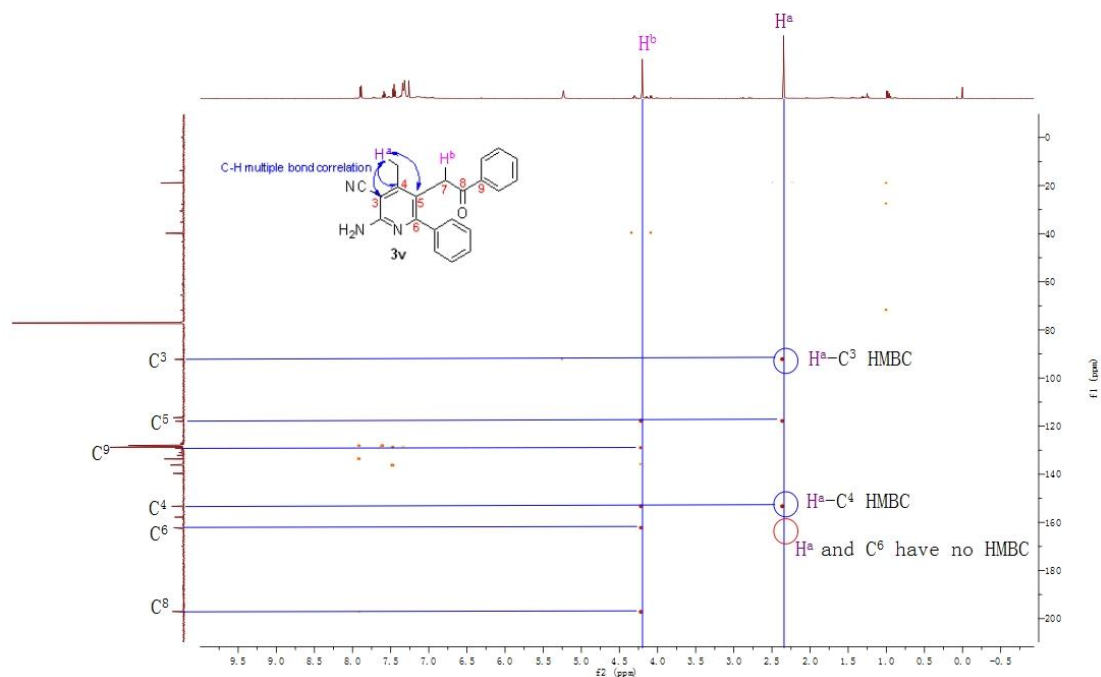

Figure S2.  $^{13}\text{C}$ - $^1\text{H}$  HMBC spectrum of **3v**.

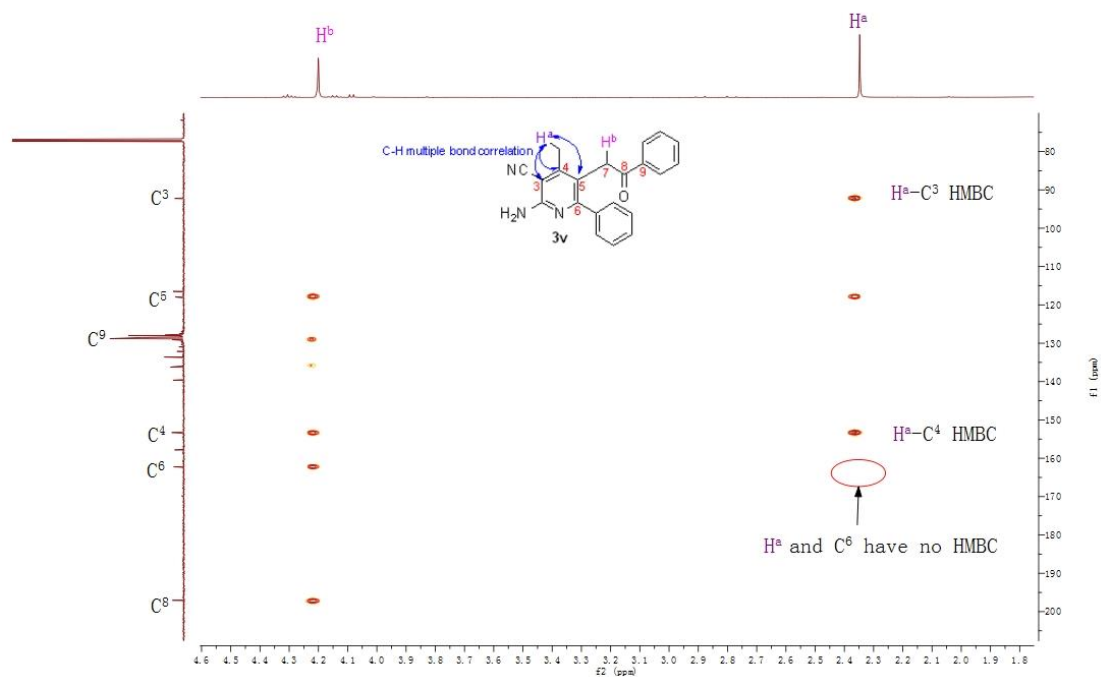

Figure S3. Partial enlarged view of  $^{13}\text{C}$ - $^1\text{H}$  HMBC spectrum of **3v**.
